# Supplementary material for: The Chemosensory Transcriptome of a Diving Beetle
Source: Frontiers journal article supplement (doi:10.3389/fevo.2021.773915), 2021-12-03
Supplement: Table_2.XLSX [file Table_2.XLSX]

## Sheet: comp. sensory organs vs muscle
	Supplementary Table 2. Complete lists of unigenes specifically expressed in chemosensory organs compared with wing muscle, or specifically expressed in male or female chemosensory organs, as determined by Cuffdiff (FDR<0.05).
	unigene	annotation	male antennae FPKM	female antennae FPKM	male palps FPKM	female palps FPKM	wing muscle FPKM	transmembrane helices	signal peptide	Best BlastP hit	Species	UniProt ID	E-value	Pfam-A domain	Pfam code
	contig_341206		2.13393	11.0019	0.365637	3.3604	0	0						5-formyltetrahydrofolate cyclo-ligase family	PF01812
	contig_2885		0.937074	0.4996	1.25457	1.11184	0	7		Starry night	Tribolium castaneum	A0A139WBL5	0.0	7 transmembrane receptor (Secretin family)	PF00002
	contig_63333		5.18147	7.8663	5.09159	7.71173	0	7		Uncharacterized protein	Photinus pyralis	A0A1Y1KGY6	8.68e-135	7 transmembrane receptor (Secretin family)	PF00002
	contig_118221	RsutGR2	0.787123	0.762854	72.2262	65.2121	0	7		Gustatory receptor	Holotrichia parallela	A0A2P9JYB2	0.0	7tm Chemosensory receptor	PF08395
	contig_135366	RsutGR62	0	0	6.06236	5.50218	0	7		Gustatory receptor	Tribolium castaneum	D6WK48	2.01e-25	7tm Chemosensory receptor	PF08395
	contig_282127	RsutGR3	0.744705	1.01532	19.2558	19.0652	0	7		Gustatory receptor	Tribolium castaneum	A2AXA0	3.70e-113	7tm Chemosensory receptor	PF08395
	contig_319727	RsutGR13	0	0	3.98041	2.70563	0	7		Gustatory receptor	Rhodnius prolixus	T1HCN1	9.19e-29	7tm Chemosensory receptor	PF08395
	contig_231736	RsutGR1	0.210286	0.129568	17.0293	14.4866	0	6		Gustatory receptor	Anomala corpulenta	A0A0E3Y701	0.0	7tm Chemosensory receptor	PF08395
	contig_18515	RsutGR58	0	0.083589	15.247	11.0737	0	6		Gustatory receptor	Zootermopsis nevadensis	A0A067R3T7	9.10e-22	7tm Chemosensory receptor	PF08395
	contig_303153	RsutGR55	0.475956	0.367244	9.45584	8.22887	0	5		Gustatory receptor	Tribolium castaneum	A2AXB7	3.04e-80	7tm Chemosensory receptor	PF08395
	contig_190662	RsutGR17	2.46549	1.62108	13.0789	14.5674	0	2		Gustatory receptor	Zootermopsis nevadensis	A0A067RU62	5.85e-14	7tm Chemosensory receptor	PF08395
	contig_47704	RsutGR56	1.85434	3.16046	10.3997	8.18537	0	7		Gustatory receptor	Anomala corpulenta	A0A0E3Y6R9	5.02e-74	7tm Chemosensory receptor	PF08395
	contig_153692	RsutGR25	0	0	5.52646	3.72599	0	8		Gustatory receptor 16	Anoplophora chinensis	A0A2P1JHF7	9.59e-11	7tm Chemosensory receptor	PF08395
	contig_304643	RsutGR37	0	0	105.294	106.269	0	8						7tm Chemosensory receptor	PF08395
	contig_305805	RsutGR43	6.87941	4.22068	17.4695	13.926	0	8						7tm Chemosensory receptor	PF08395
	contig_308810	RsutGR36	0.400516	0.282377	41.7099	53.8247	0	8						7tm Chemosensory receptor	PF08395
	contig_121615	RsutGR39	0	0	8.09491	6.60528	0	7						7tm Chemosensory receptor	PF08395
	contig_304753	RsutGR38	0.251048	0.775496	6.24342	6.62659	0	7						7tm Chemosensory receptor	PF08395
	contig_335693	RsutGR22	0	0	13.576	9.81626	0	7						7tm Chemosensory receptor	PF08395
	contig_31107	RsutGR48	0.233558	0.0965808	4.39419	2.12847	0	6						7tm Chemosensory receptor	PF08395
	contig_35441	RsutGR63	4.13571	3.90428	4.75449	4.52456	0	6						7tm Chemosensory receptor	PF08395
	contig_214572	RsutGR9	0	0	117.256	167.57	0	5						7tm Chemosensory receptor	PF08395
	contig_258849	RsutGR72	0	0	92.3832	114.592	0	5						7tm Chemosensory receptor	PF08395
	contig_92551	RsutGR73	0	0	54.4304	59.3697	0	2						7tm Chemosensory receptor	PF08395
	contig_214574		0	0	97.6737	109.324	0	1						7tm Chemosensory receptor	PF08395
	contig_243382	RsutOR35	32.2223	29.4481	0.299811	1.27703	0	8		Odorant receptor	Eogystia hippophaecolus	A0A1B3P5T6	2.29e-42	7tm Odorant receptor	PF02949
	contig_90913	RsutOR32	0.58962	0.567057	14.1781	17.4756	0	7		Odorant receptor	Tribolium castaneum	D6WV53	5.30e-14	7tm Odorant receptor	PF02949
	contig_378681	RsutOR20	15.685	16.7199	0	0	0	6		Odorant receptor	Anomala corpulenta	A0A0E3U361	1.82e-15	7tm Odorant receptor	PF02949
	contig_232975	RsutOR14	42.9288	51.7156	0	0	0	6		Odorant receptor	Anomala corpulenta	A0A0E3U2K6	4.69e-20	7tm Odorant receptor	PF02949
	contig_378719	RsutOR28	0.0754343	0.0935207	25.3112	25.087	0	6		Odorant receptor	Holotrichia parallela	A0A2P9JY58	7.69e-19	7tm Odorant receptor	PF02949
	contig_73876	RsutOR25	5.73676	3.97377	0.96036	1.38484	0	5		Odorant receptor	Anomala corpulenta	A0A0E3U361	2.85e-22	7tm Odorant receptor	PF02949
	contig_137544	RsutOR27	25.0809	26.211	0.0662981	0.0588455	0	5		Odorant receptor	Anomala corpulenta	A0A0E3U361	5.96e-30	7tm Odorant receptor	PF02949
	contig_88899	RsutOR16	71.404	77.1243	0.187428	0.221782	0	5		Odorant receptor	Anomala corpulenta	A0A0E3Y765	9.63e-31	7tm Odorant receptor	PF02949
	contig_335621	RsutOR10	25.8011	27.3847	0.669005	0.809568	0	4		Odorant receptor	Holotrichia parallela	A0A2P0ZPI4	1.24e-72	7tm Odorant receptor	PF02949
	contig_139702	RsutOR26	0	0.0965808	7.1905	5.67592	0	4		Odorant receptor	Anomala corpulenta	A0A0E3U361	3.49e-26	7tm Odorant receptor	PF02949
	contig_80480	RsutOR30	0.395923	0	25.7942	23.074	0	3		Odorant receptor	Holotrichia parallela	A0A2P9JY58	8.97e-17	7tm Odorant receptor	PF02949
	contig_329285	RsutOR18	39.1457	38.4199	0.0650677	0	0	3		Odorant receptor	Holotrichia parallela	A0A2P9JY58	9.16e-24	7tm Odorant receptor	PF02949
	contig_137782	RsutOR36	26.9539	30.8209	0.128869	0.228751	0	4		Odorant receptor 10	Anoplophora chinensis	A0A2P1JHA0	4.33e-34	7tm Odorant receptor	PF02949
	contig_160929	RsutOR33	0	0	56.3997	61.3337	0	2		Odorant receptor 29	Holotrichia parallela	A0A2P9JY67	3.48e-14	7tm Odorant receptor	PF02949
	contig_101760	RsutOR40	10.9587	11.3799	0	0	0	7		Odorant receptor 30	Anoplophora chinensis	A0A2P1JHB9	4.50e-71	7tm Odorant receptor	PF02949
	contig_262806	RsutOR11	15.573	18.9333	0	0.0771737	0	5		Odorant receptor 33	Anoplophora chinensis	A0A2P1JHC3	5.53e-56	7tm Odorant receptor	PF02949
	contig_375022	RsutOR13	3.85285	1.90498	0	0	0	5		Odorant receptor 33	Anoplophora chinensis	A0A2P1JHC3	6.15e-33	7tm Odorant receptor	PF02949
	contig_12997	RsutOR34	2.01956	0	23.921	3.32127	0	6		odorant receptor 67c-like	Agrilus planipennis	A0A1W4W5V0	2.70e-13	7tm Odorant receptor	PF02949
	contig_270149	RsutOR6	14.9381	17.3924	0	0	0	6		Odorant receptor 73	Tribolium castaneum	D2A4W8	1.77e-88	7tm Odorant receptor	PF02949
	contig_233737	RsutOR5	14.469	23.1721	0	0	0	6		Odorant receptor 73	Tribolium castaneum	D2A4W8	2.73e-108	7tm Odorant receptor	PF02949
	contig_61313	RsutOR4	10.0866	10.4838	0	0	0	6		Odorant receptor 73	Tribolium castaneum	D2A4W8	7.38e-100	7tm Odorant receptor	PF02949
	contig_233736	RsutOR7	6.01024	9.64455	0.127083	0.0563933	0	6		Odorant receptor 73	Tribolium castaneum	D2A4W8	7.79e-81	7tm Odorant receptor	PF02949
	contig_324742	RsutOR37	15.6346	12.4821	0	0.202977	0	2		Olfactory receptor 40	Helicoverpa assulta	A0A0B5A3C7	1.10e-16	7tm Odorant receptor	PF02949
	contig_73877	RsutOR22	3.95513	3.94221	0	0	0	6		Putative odorant receptor	Peridroma saucia	A0A2L1TG71	1.52e-33	7tm Odorant receptor	PF02949
	contig_327519	RsutOR41	8.718	7.6379	0.0634065	0.0562731	0	6		Uncharacterized protein	Tribolium castaneum	A0A139WML2	9.08e-81	7tm Odorant receptor	PF02949
	contig_153828	RsutOR38	9.43986	10.5824	0	0	0	3		Uncharacterized protein	Tribolium castaneum	A0A139WMN8	4.66e-14	7tm Odorant receptor	PF02949
	contig_365943	RsutOR31	0	0	14.3414	10.6626	0	2		Uncharacterized protein	Tribolium castaneum	A0A139WCV0	1.69e-15	7tm Odorant receptor	PF02949
	contig_11367	RsutOR17	11.4938	14.1789	0.260266	0.154122	0	5						7tm Odorant receptor	PF02949
	contig_106858	RsutOR15	28.9021	37.9939	0	0	0	3						7tm Odorant receptor	PF02949
	contig_25023	RsutOR15	30.2994	45.689	0	0	0	2						7tm Odorant receptor	PF02949
	contig_265391	RsutOR28	0	0.485502	43.4951	22.0482	0	0						7tm Odorant receptor	PF02949
	contig_240520		0.0783435	0	40.3138	30.829	0	11		Multidrug resistance protein like protein 49	Dufourea novaeangliae	A0A154NXY7	0.0	ABC transporter transmembrane region	PF00664
	contig_221093		0.228281	0	13.8439	13.8757	0	1						ABC-2 family transporter protein	PF12698
	contig_214352		215.151	232.349	251.531	213.837	0	1		AAEL015551-PA	Aedes aegypti	Q1DGP3	1.40e-20	ABC-2 type transporter	PF01061
	contig_354676		1.94799	1.41637	2.10627	1.70367	0	3		Scarlet	Tribolium castaneum	A0A0K0LSP5	0.0	ABC-2 type transporter	PF01061
	contig_70655		74.0652	82.9525	66.8556	64.5335	0	0		Intraflagellar transport protein 52 homolog-like Protein	Tribolium castaneum	D6WS70	1.43e-90	ABC-type uncharacterized transport system	PF09822
	contig_69726		1.39625	4.06472	674.928	487.559	0	0		Uncharacterized protein	Photinus pyralis	A0A1Y1NK21	5.59e-13	Actin interacting protein 3	PF03915
	contig_69732		0	0	250.309	247.261	0	0						Actin interacting protein 3	PF03915
	contig_93391		9.01533	11.8168	218.245	257.341	0	1		Uncharacterized protein	Photinus pyralis	A0A1Y1N5C2	1.65e-118	Acyltransferase	PF01553
	contig_341019		1.55062	2.22015	2.49609	4.49344	0	6	CS pos: 17-18 SVA-FS Pr: 04292	Nose resistant to fluoxetine protein 6-like Protein	Tribolium castaneum	D2A530	0.0	Acyltransferase family	PF01757
	contig_339570		1200.11	1518.17	1982.25	2384.33	0	3		Putative nose resistant to fluoxetine protein 6	Anopheles triannulatus	A0A2M4ASR4	8.86e-32	Acyltransferase family	PF01757
	contig_295878		13.3182	13.7968	108.883	91.8275	0	9		Uncharacterized protein	Dendroctonus ponderosae	N6U8Y8	2.72e-84	Acyltransferase family	PF01757
	contig_358572		1.68785	2.80559	0.140243	0.207314	0	0	CS pos: 15-16 GQS-FK Pr: 05916	Uncharacterized protein	Nasonia vitripennis	K7ILT4	1.24e-141	Adenosine/AMP deaminase	PF00962
	contig_9315		1.17482	1.14503	5.26793	6.05264	0	0		Guanylate cyclase	Tribolium castaneum	D6X0Y9	0.0	Adenylate and Guanylate cyclase catalytic domain	PF00211
	contig_233871		0.758583	3.27319	1.22205	7.29404	0	1		Uncharacterized protein	Photinus pyralis	A0A1Y1MP30	8.71e-86	Alpha 1,4-glycosyltransferase conserved region	PF04572
	contig_349482		0.241525	0.45461	9.6848	12.5903	0	2		Pickpocket protein 11-like Protein	Tribolium castaneum	D7EHU3	7.98e-69	Amiloride-sensitive sodium channel	PF00858
	contig_162809		26.2768	27.5769	13.1749	13.2167	0	2		Sodium channel protein Nach	Zootermopsis nevadensis	A0A067QUS0	1.70e-46	Amiloride-sensitive sodium channel	PF00858
	contig_37680		0.271831	0.252255	3.69461	4.57922	0	1		Sodium channel protein Nach-like Protein	Tribolium castaneum	A0A139WEM9	2.70e-121	Amiloride-sensitive sodium channel	PF00858
	contig_337212		0.946712	1.11701	2.68552	3.53859	0	14		cationic amino acid transporter 2	Agrilus planipennis	A0A1W4XP81	0.0	Amino acid permease	PF13520
	contig_317381		34.1452	38.3042	74.7447	90.2746	0	6		Uncharacterized protein	Photinus pyralis	A0A1Y1LHI2	1.94e-75	Amino acid permease	PF13520
	contig_317410		12.7391	15.487	34.0932	53.0281	0	2		Uncharacterized protein	Dendroctonus ponderosae	N6T7H7	1.92e-40	Amino acid permease	PF00324
	contig_317389		12.8462	16.3295	42.2041	36.3547	0	5		Uniporter amino acid transporter 5	Tenebrio molitor	A0A1Y0AWF2	1.65e-94	Amino acid permease	PF13520
	contig_22262		33.6046	40.2023	11.3522	12.5118	0	5		Uncharacterized protein	Daphnia pulex	E9HAS9	1.23e-72	Ammonium Transporter Family	PF00909
	contig_124470		1131.84	1408.1	85.5497	56.3403	0	1	CS pos: 23-24 VLC-SR Pr: 03716	Acetyl-coenzyme A synthetase-like Protein	Tribolium castaneum	D6WA83	2.65e-21	AMP-binding enzyme	PF00501
	contig_124466		3045.14	3838.66	205.608	120.271	0	0		Luciferin 4-monooxygenase	Trachymyrmex septentrionalis	A0A195EZI3	2.69e-18	AMP-binding enzyme	PF00501
	contig_42032		89.8311	89.8815	234.497	215.423	0	3		Luciferin 4-monooxygenase-like Protein	Tribolium castaneum	D6WFQ8	6.35e-39	AMP-binding enzyme	PF00501
	contig_124461		875.28	981.151	76.5488	59.9792	0	0		Uncharacterized protein	Photinus pyralis	A0A1Y1MDF1	1.87e-53	AMP-binding enzyme	PF00501
	contig_42023		92.6359	80.9	259.824	268.632	0	0		Uncharacterized protein	Tribolium castaneum	D6WF94	2.06e-28	AMP-binding enzyme	PF00501
	contig_124469		717.72	693.35	32.7972	24.7057	0	0		Uncharacterized protein	Tribolium castaneum	D6WF94	9.33e-11	AMP-binding enzyme	PF00501
	contig_124476		379.995	531.012	19.2193	24.1867	0	0		Uncharacterized protein	Photinus pyralis	A0A1Y1N3Z3	3.78e-22	AMP-binding enzyme	PF00501
	contig_297498		134.248	133.408	576.564	688.301	0	0		Luciferin 4-monooxygenase	Cryptotermes secundus	A0A2J7QLT9	3.45e-11	AMP-binding enzyme C-terminal domain	PF13193
	contig_42027		173.106	183.971	421.24	427.099	0	0		Luciferin 4-monooxygenase	Sipha flava	A0A2S2QPY3	9.69e-25	AMP-binding enzyme C-terminal domain	PF13193
	contig_124467		1157.06	1446.84	62.8804	51.2058	0	0		Luciferin 4-monooxygenase-like Protein	Tribolium castaneum	D6WFQ8	5.80e-42	AMP-binding enzyme C-terminal domain	PF13193
	contig_32528		37.7795	28.647	70.2702	46.566	0	1		Uncharacterized protein	Dendroctonus ponderosae	N6TNN8	1.02e-33	Anaphase-promoting complex subunit 4 WD40 domain	PF12894
	contig_76170		48.7426	60.3095	59.5501	44.4263	0	0		Angiotensin-converting enzyme	Tribolium castaneum	A0A139WAY6	8.93e-53	Angiotensin-converting enzyme	PF01401
	contig_76194		75.8402	75.3289	91.6393	69.0314	0	0		Angiotensin-converting enzyme	Homalodisca liturata	A0A1B6JD67	7.97e-45	Angiotensin-converting enzyme	PF01401
	contig_76181		69.0115	91.1123	139.774	102.374	0	0		Uncharacterized protein	Dendroctonus ponderosae	N6U720	2.16e-28	Angiotensin-converting enzyme	PF01401
	contig_171321		222.991	353.779	91.7748	63.5551	0	0		Peroxidase	Bactrocera latifrons	A0A0K8VYG6	1.51e-20	Animal haem peroxidase	PF03098
	contig_171328		745.224	860.514	163.986	127.234	0	0		Peroxidase-like Protein	Tribolium castaneum	A0A139WNI1	2.79e-19	Animal haem peroxidase	PF03098
	contig_171322		399.373	465.499	164.009	113.063	0	0		SFRICE_011074	Spodoptera frugiperda	A0A2H1WEE0	5.62e-95	Animal haem peroxidase	PF03098
	contig_339498		5.24265	2.9422	11.5344	5.46579	0	0		Uncharacterized protein	Dendroctonus ponderosae	N6UAQ6	3.83e-38	Animal haem peroxidase	PF03098
	contig_174030		329.819	373.865	158.865	154.16	0	0		Uncharacterized protein	Photinus pyralis	A0A1Y1MJQ2	1.10e-32	Ankyrin repeat	PF00023
	contig_320308		4.14673	4.65757	3.27715	3.73444	0	7		Uncharacterized protein	Photinus pyralis	A0A1Y1MUU8	0.0	Ankyrin repeats (3 copies)	PF12796
	contig_362477		0.715085	0.246323	4.48536	1.09748	0	0		Uncharacterized protein	Photinus pyralis	A0A1Y1MLJ9	0.0	Ankyrin repeats (3 copies)	PF12796
	contig_20613		10.9975	6.36777	13.905	10.7609	0	0		Uncharacterized protein	Blattella germanica	A0A2P8YT82	2.91e-28	Ankyrin repeats (3 copies)	PF12796
	contig_156665		11.5963	12.3706	12.7459	12.2793	0	0		Uncharacterized protein	Tribolium castaneum	A0A139WBY4	2.70e-87	Ankyrin repeats (many copies)	PF13857
	contig_174039		72.5079	83.8396	49.5495	47.0719	0	0		Uncharacterized protein	Solenopsis invicta	E9IN85	3.95e-82	Ankyrin repeats (many copies)	PF13857
	contig_375993		494.02	573.398	363.292	469.217	0	0		Annexin	Blattella germanica	A0A2P8Y396	8.64e-36	Annexin	PF00191
	contig_187371		204.247	236.354	177.43	215.079	0	0		Annexin	Blattella germanica	A0A2P8Y395	8.96e-57	Annexin	PF00191
	contig_353291		6.72565	1.55701	0	3.01675	0	0		Uncharacterized protein	Bactrocera latifrons	A0A0K8UJL1	1.82e-11	Antibiotic biosynthesis monooxygenase	PF03992
	contig_188611		16.6852	27.2725	18.5663	25.3813	0	0						Apidaecin	PF00807
	contig_188345		24.7843	2.48179	0	8.55967	0	1						Apolipoprotein A1/A4/E domain	PF01442
	contig_358943		0	0	44.7135	0.90352	0	1						Apolipoprotein A1/A4/E domain	PF01442
	contig_11230		148.778	314.681	67.807	182.696	0	0						Apolipoprotein O	PF09769
	contig_18423		21.9601	3.20648	24.6228	4.23954	0	0		1,2-dihydroxy-3-keto-5-methylthiopentene dioxygenase	Ooceraea biroi	A0A026VTR3	1.04e-39	ARD/ARD' family	PF03079
	contig_188242		0	26.2615	0	0	0	0						Argininosuccinate lyase C-terminal	PF14698
	contig_179317		4.70493	4.37768	0.307588	0.515082	0	0		Armadillo repeat-containing protein 4-like Protein	Tribolium castaneum	A0A139W9M0	0.0	Armadillo/beta-catenin-like repeat	PF00514
	contig_69		2.75388	3.28462	15.9626	13.2778	0	0		arrestin homolog	Agrilus planipennis	A0A1W4XEW9	1.63e-116	Arrestin (or S-antigen), C-terminal domain	PF02752
	contig_86439		355.691	474.665	537.11	620.004	0	0	CS pos: 17-18 CIA-RP Pr: 07123					Arthropod defensin	PF01097
	contig_132164		2.41856	0.161647	3.68741	0.416563	0	1		uncharacterized protein LOC108735248	Agrilus planipennis	A0A1W4WF82	2.67e-43	Arylsulfotransferase (ASST)	PF14269
	contig_320018		182.231	343.066	143.826	217.698	0	2						Associated with zinc fingers	PF07530
	contig_348051		7.82454	7.26324	1.85989	1.50175	0	1	CS pos: 29-30 LQA-RI Pr: 05912	Metalloendopeptidase	Tribolium castaneum	D7EJG8	5.92e-165	Astacin (Peptidase family M12A)	PF01400
	contig_233443		34.0416	41.0351	17.6037	26.1042	0	0		Intraflagellar transport protein 81-like protein	Cryptotermes secundus	A0A2J7Q9D1	1.54e-75	AT-hook-containing transcription factor	PF12443
	contig_215823		91.3141	83.0417	24.8038	21.5037	0	0		Uncharacterized protein	Tribolium castaneum	A0A139WBY4	2.91e-81	ATP:guanido phosphotransferase, C-terminal catalytic domain	PF00217
	contig_215807		12.92	18.5633	4.22324	3.17464	0	0		Uncharacterized protein	Atta cephalotes	A0A158NQ91	1.84e-42	ATP:guanido phosphotransferase, N-terminal domain	PF02807
	contig_153031		3.73273	3.71084	7.86402	6.21186	0	0		Katanin p60 ATPase-containing subunit A1	Pediculus humanus subsp. corporis	A0A2C9NGQ7	0.0	ATPase family associated with various cellular activities (AAA)	PF00004
	contig_175693		4.06267	5.00668	0.649031	0.671784	0	0		Spastin-like Protein	Tribolium castaneum	D6WR54	5.43e-135	ATPase family associated with various cellular activities (AAA)	PF00004
	contig_200778		2.11307	5.31261	2.10605	4.90978	0	0						BAG domain	PF02179
	contig_59277		5.91555	6.82469	5.71663	4.43529	0	0		D site-binding protein	Zootermopsis nevadensis	A0A067RX19	2.63e-46	Basic region leucine zipper	PF07716
	contig_216644		3.2611	4.54964	1.07245	1.42653	0	0		Uncharacterized protein	Tribolium castaneum	A0A139WNX8	6.18e-119	Biogenesis of lysosome-related organelles complex-1 subunit 2	PF10046
	contig_255057		3.74308	2.50801	6.35441	5.60227	0	0		Uncharacterized protein	Tribolium castaneum	D2A114	0.0	BTB/POZ domain	PF00651
	contig_57511		1.98133	2.0737	2.43691	2.25182	0	0		Uncharacterized protein	Poecilia formosa	A0A096LXH1	7.35e-12	C2H2-type zinc finger	PF13894
	contig_252356		9.49943	10.1707	6.39847	6.24215	0	0		Uncharacterized protein	Photinus pyralis	A0A1Y1LFX9	9.11e-51	C2H2-type zinc finger	PF13912
	contig_70128		8.98344	7.02979	6.08064	6.89181	0	0		Uncharacterized protein	Photinus pyralis	A0A1Y1M4X1	3.64e-159	Cache domain	PF02743
	contig_107265		95.4205	112.696	412.979	606.08	0	0		Sphingomyelin phosphodiesterase	Ooceraea biroi	A0A026WAA6	7.01e-61	Calcineurin-like phosphoesterase	PF00149
	contig_107263		53.7064	62.3429	263.716	303.638	0	0		Sphingomyelin phosphodiesterase	Fopius arisanus	A0A0C9RL82	9.09e-40	Calcineurin-like phosphoesterase	PF00149
	contig_246982		254.131	272.802	146.902	171.38	0	1		Anoctamin	Dendroctonus ponderosae	N6U0P0	2.61e-74	Calcium-activated chloride channel	PF04547
	contig_374524		10.5759	17.4382	0.421946	0.281291	0	0		Uncharacterized protein	Dendroctonus ponderosae	N6UEM7	4.73e-47	Calmodulin-binding	PF13864
	contig_187877		7.1123	6.08854	2.4007	2.59769	0	0		Uncharacterized protein	Tribolium castaneum	A0A139WJK7	2.47e-106	Calponin homology (CH) domain	PF00307
	contig_333705		15.0109	28.8075	21.1934	32.9258	0	1		Carboxylic ester hydrolase	Dendroctonus ponderosae	U4UFS6	2.76e-39	Carboxylesterase family	PF00135
	contig_333714		44.0505	60.0023	90.4326	100.356	0	0	CS pos: 19-20 GLS-GD Pr: 03644	Carboxylic ester hydrolase	Leptinotarsa decemlineata	A0A0A7EQM9	2.28e-114	Carboxylesterase family	PF00135
	contig_317173		324.238	427.114	580.177	805.71	0	0	CS pos: 19-20 CLS-GD Pr: 04677	Carboxylic ester hydrolase	Liposcelis bostrychophila	B6D7H0	2.95e-77	Carboxylesterase family	PF00135
	contig_263675		126.059	131.045	217.879	195.145	0	0		Carboxylic ester hydrolase	Tenebrio molitor	A0A0K1YW40	4.65e-61	Carboxylesterase family	PF00135
	contig_317168		202.611	233.927	319.079	278.543	0	0		Carboxylic ester hydrolase	Harmonia axyridis	E2QC35	4.75e-26	Carboxylesterase family	PF00135
	contig_356304		673.801	804.904	766.886	976.548	0	0		Carboxylic ester hydrolase	Harmonia axyridis	E2QC35	9.83e-26	Carboxylesterase family	PF00135
	contig_263672		94.0766	127.079	99.9666	161.456	0	0		Carboxylic ester hydrolase	Leptinotarsa decemlineata	A0A0A7ENL4	1.51e-12	Carboxylesterase family	PF00135
	contig_31343		850.319	770.264	1615.16	1427.1	0	0	CS pos: 17-18 VYS-SR Pr: 08301	Putative Carboxypeptidase B	Daphnia magna	A0A0P5LEP1	2.31e-11	Carboxypeptidase activation peptide	PF02244
	contig_252581		39.4492	44.8587	69.4973	77.8829	0	0		Caspase	Trachymyrmex cornetzi	A0A151IZ30	4.10e-47	Caspase domain	PF00656
	contig_371760		4.8501	6.10295	7.82058	6.47906	0	2	CS pos: 19-20 VLG-QL Pr: 08665	Uncharacterized protein	Photinus pyralis	A0A1Y1LAD1	1.22e-58	CD20-like family	PF04103
	contig_284635		2.6586	1.70302	3.47358	2.52007	0	2		scavenger receptor class B member 1-like	Agrilus planipennis	A0A1W4WTV9	0.0	CD36 family	PF01130
	contig_93159		771.126	882.063	1444.79	1311.73	0	1		scavenger receptor class B member 1-like	Agrilus planipennis	A0A1W4WGT2	7.27e-38	CD36 family	PF01130
	contig_93152		535.045	675.965	832.277	775.372	0	0		scavenger receptor class B member 1-like	Agrilus planipennis	A0A1W4WGT2	1.22e-78	CD36 family	PF01130
	contig_21684		533.251	644.855	368.03	418.326	0	0		sensory neuron membrane protein 1-like	Agrilus planipennis	A0A1W4WII7	4.60e-35	CD36 family	PF01130
	contig_200289		9.58466	11.2377	16.5677	25.907	0	2		Sensory neuron membrane protein 2	Holotrichia parallela	A0A2P1ERQ2	9.63e-130	CD36 family	PF01130
	contig_161176		60.7844	61.0144	0.351382	0.272674	0	2		Sensory neuron membrane protein SNMP-1 mRNA	Tenebrio molitor	A0A0C5DMP8	1.21e-168	CD36 family	PF01130
	contig_338951		9.80319	19.23	7.43408	9.75126	0	0		Peritrophin-1	Folsomia candida	A0A226EDE7	1.97e-11	Chitin binding Peritrophin-A domain	PF01607
	contig_282529		2.98218	2.7313	0	0	0	0		SFRICE_001790	Spodoptera frugiperda	A0A2H1V2T4	8.08e-18	Chitin binding Peritrophin-A domain	PF01607
	contig_103067		22347.8	30654	15050.2	23636	30.6657	0						Chitin binding Peritrophin-A domain	PF01607
	contig_162001		120.027	177.49	163.92	263.118	0	0						Chitin binding Peritrophin-A domain	PF01607
	contig_185467		12.7014	16.632	7.34275	16.1353	0	0	CS pos: 27-28 VTC-QT Pr: 07931					Chitin binding Peritrophin-A domain	PF01607
	contig_247933		1046.68	1062.35	939.13	992.232	0	0						Chitin binding Peritrophin-A domain	PF01607
	contig_335639		3644.74	5207.76	4477.3	6349.46	0	0						Chitin binding Peritrophin-A domain	PF01607
	contig_56530		26.3927	31.559	6.71767	10.5867	0	0	CS pos: 21-22 VSS-QF Pr: 08723					Chitin binding Peritrophin-A domain	PF01607
	contig_256150		11.9758	13.1758	9.66565	14.6489	0	0						Chromo (CHRromatin Organisation MOdifier) domain	PF00385
	contig_92675		18.6723	16.2908	12.0542	12.9206	0	0		Bardet-Biedl syndrome 2 protein homolog	Tribolium castaneum	D6WSV9	4.35e-65	Ciliary BBSome complex subunit 2, N-terminal	PF14781
	contig_2408		14.5146	15.5107	0.568952	0.633012	0	0		Uncharacterized protein	Tribolium castaneum	D6X317	1.37e-90	Coiled-coil protein 142	PF14923
	contig_108543		3.23611	5.06235	0.21061	0.280263	0	0		Uncharacterized protein	Tribolium castaneum	D6X317	3.38e-140	Coiled-coil protein 142	PF14923
	contig_193959		21.0616	8.36251	0	17.1727	0	0		Histone H2A	Bactrocera latifrons	A0A0K8U5M3	2.23e-58	Core histone H2A/H2B/H3/H4	PF00125
	contig_252712		22.3622	25.1309	1105.49	1176.77	0	0		alpha-tocopherol transfer protein-like	Agrilus planipennis	A0A1W4X5F9	1.22e-84	CRAL/TRIO domain	PF00650
	contig_272412		17.8249	63.055	1181.32	1581.9	0	0		alpha-tocopherol transfer protein-like	Agrilus planipennis	A0A1W4X5F9	5.62e-16	CRAL/TRIO domain	PF00650
	contig_331395		4677.47	5680.74	1217.69	1167.52	0	0		Alpha-tocopherol transfer protein-like	Tribolium castaneum	A0A139WD63	7.38e-22	CRAL/TRIO domain	PF00650
	contig_111257		136.992	153.5	230.37	282.578	0	0		alpha-tocopherol transfer protein-like	Agrilus planipennis	A0A1W4WK00	9.95e-99	CRAL/TRIO domain	PF00650
	contig_69728		3.11436	0	523.875	481.257	0	0		Alpha-tocopherol transfer-like protein	Anoplophora glabripennis	V5I956	1.73e-20	CRAL/TRIO domain	PF00650
	contig_87876		150.528	164.055	432.009	437.875	0	0		Alpha-tocopherol transfer-like protein	Anoplophora glabripennis	V5I956	5.02e-27	CRAL/TRIO domain	PF00650
	contig_133977		7.74773	14.5319	21.2303	30.2778	0	0		Alpha-tocopherol transfer-like protein	Anoplophora glabripennis	V5I956	6.11e-61	CRAL/TRIO domain	PF00650
	contig_87878		178.548	181.524	466.143	419.022	0	0		CRAL/TRIO domain-containing protein	Anopheles darlingi	W5JP64	1.47e-15	CRAL/TRIO domain	PF00650
	contig_179764		81.0581	83.4976	152.011	140.549	0	0		CRAL-TRIO domain containing protein	Oryctes borbonicus	A0A0T6ATJ8	6.91e-115	CRAL/TRIO domain	PF00650
	contig_323520		500.81	575.534	1094.18	1109.75	0	0		Retinaldehyde-binding protein 1-like protein 1	Zootermopsis nevadensis	A0A067RPT1	2.18e-19	CRAL/TRIO domain	PF00650
	contig_14192		16.6998	26.272	27.9952	32.9806	0	0		Uncharacterized protein	Apis mellifera	A0A087ZQ01	1.09e-126	CRAL/TRIO domain	PF00650
	contig_105869		0	0.561568	196.881	155.381	0	0		Uncharacterized protein	Trichomalopsis sarcophagae	A0A232EQE5	1.59e-17	CRAL/TRIO domain	PF00650
	contig_323526		93.823	55.6353	156.259	185.32	0	0		Uncharacterized protein	Clastoptera arizonana	A0A1B6DJD5	1.95e-19	CRAL/TRIO domain	PF00650
	contig_320614		5.91742	7.58887	0.297417	0.422269	0	0		Uncharacterized protein	Tribolium castaneum	D6WGD9	3.83e-107	CS domain	PF04969
	contig_168185		12.9642	9.29499	68.6597	65.0969	0	0		Uncharacterized protein	Dendroctonus ponderosae	N6T7V8	2.87e-25	C-terminal region of aryl-sulfatase	PF14707
	contig_253436		21.4582	10.0365	39.4071	17.1512	0	1	CS pos: 31-32 VAC-II Pr: 03568	C-type-like Lysozyme	Reticulitermes speratus	A0A1V1G5I8	3.59e-14	C-type lysozyme/alpha-lactalbumin family	PF00062
	contig_51054		267.89	318.455	1298.26	1281.66	0	0	CS pos: 13-14 TFA-VD Pr: 05840	Trypsin-like serine proteinase	Anthonomus grandis	Q64ID3	4.41e-33	CUB domain	PF00431
	contig_279327		1.36042	1.12896	5.68067	6.70186	0	0		Uncharacterized protein	Papilio machaon	A0A194RR75	1.93e-84	CUB domain	PF00431
	contig_257562		0	0.716311	13.9888	14.9485	0	0	CS pos: 19-20 IQA-DQ Pr: 09088	Uncharacterized protein	Cryptotermes secundus	A0A2J7QPF6	2.13e-85	CUB domain	PF00431
	contig_186777		232.316	6.31229	129.6	2.72448	0	0		uncharacterized protein LOC108742522	Agrilus planipennis	A0A1W4XKG5	1.49e-30	Cuticle protein CPCFC	PF17223
	contig_33016		364.084	298.058	544.964	255.503	0	0	CS pos: 20-21 VKT-YE Pr: 06539	CRISP/Allergen/PR-1	Orchesella cincta	A0A1D2NCM5	8.77e-13	Cysteine-rich secretory protein family	PF00188
	contig_144713		22.7987	29.5527	47.6224	70.6236	0	0		Golgi-associated plant pathogenesis-related protein 1	Cryptotermes secundus	A0A2J7RP43	5.43e-29	Cysteine-rich secretory protein family	PF00188
	contig_313219		61.5505	48.984	266.901	139.558	0	0	CS pos: 16-17 IDA-TC Pr: 09596	Uncharacterized protein	Photinus pyralis	A0A1Y1NF20	2.01e-17	Cysteine-rich secretory protein family	PF00188
	contig_33011		300.961	278.734	545.069	284.525	0	0	CS pos: 17-18 CLT-QF Pr: 04603	Venom allergen 3-like Protein	Tribolium castaneum	D6W9F0	2.47e-15	Cysteine-rich secretory protein family	PF00188
	contig_137679		23.1724	26.2729	117.572	101.188	0	1						Cytochrome B6-F complex subunit VI (PetL)	PF05115
	contig_159068		17.5279	51.0271	123.762	263.013	0	0		Cytochrome P450 12H1	Tribolium castaneum	D6WP99	4.51e-32	Cytochrome P450	PF00067
	contig_114244		31.1627	43.2129	53.1752	55.0975	0	0		Cytochrome P450 301B1	Tribolium castaneum	D2A103	0.0	Cytochrome P450	PF00067
	contig_162369		2.9897	3.00858	5.6168	2.34679	0	1		Cytochrome P450 6BQ13	Tribolium castaneum	D6WB59	5.68e-151	Cytochrome P450	PF00067
	contig_108707		1602.57	2174.27	518.875	366.214	0	0		Cytochrome P450 CYP6BQ22	Dastarcus helophoroides	M9TLT7	1.80e-28	Cytochrome P450	PF00067
	contig_160295		21.8225	27.2441	140.68	162.28	0	2		Cytochrome P450 monooxygenase CYP6BQ35	Tenebrio molitor	A0A0K1YWE6	2.08e-134	Cytochrome P450	PF00067
	contig_243870		3.6392	4.30686	1.09359	0.485773	0	2		Putative cytochrome P450 6a13	Zootermopsis nevadensis	A0A067RK29	5.69e-45	Cytochrome P450	PF00067
	contig_187886		5.85168	7.78472	1.96887	4.4448	0	2		Putative cytochrome P450 6a14	Cryptotermes secundus	A0A2J7R4P8	1.18e-166	Cytochrome P450	PF00067
	contig_48897		25.7501	26.6425	122.633	126.596	0	2		Putative cytochrome P450 6a14	Cryptotermes secundus	A0A2J7R4Q0	3.09e-114	Cytochrome P450	PF00067
	contig_156394		29.886	13.2851	19.9927	4.72776	0	1		Uncharacterized protein	Glossina brevipalpis	A0A1A9W296	5.75e-105	Cytochrome P450	PF00067
	contig_64438		1.53054	9.12974	1.80615	3.33051	0	1		Uncharacterized protein	Photinus pyralis	A0A1Y1KCR3	7.02e-141	Cytochrome P450	PF00067
	contig_72829		19.6764	13.4565	20.1664	20.0971	0	0		Uncharacterized protein	Photinus pyralis	A0A1Y1K2A7	2.42e-156	Cytochrome P450	PF00067
	contig_108714		6678.86	8745.55	1305.78	1149.87	0	0		Uncharacterized protein	Cryptotermes secundus	A0A2J7R4Q4	9.67e-25	Cytochrome P450	PF00067
	contig_160300		71.5303	51.5222	236.864	245.865	0	0		Uncharacterized protein	Photinus pyralis	A0A1Y1K8X2	2.18e-21	Cytochrome P450	PF00067
	contig_260096		24.7718	18.8917	5.58253	2.82106	0	0	CS pos: 28-29 SQG-DS Pr: 05910	Uncharacterized protein	Photinus pyralis	A0A1Y1MKW7	1.23e-43	DAN domain	PF03045
	contig_331151		0.562274	0.354663	21.1196	26.3967	0	0		Transposable element Tc1 transposase	Anoplophora glabripennis	V5GP73	1.03e-78	DDE superfamily endonuclease	PF13358
	contig_342521		3.05566	2.62709	11.0049	12.5941	0	0		uncharacterized protein LOC108734152	Agrilus planipennis	A0A1W4WAP5	1.02e-68	DDE superfamily endonuclease	PF03184
	contig_261111		6166.33	161.749	11629.4	71.8	0	1	CS pos: 29-30 ASA-KP Pr: 06200					DIM protein	PF08194
	contig_256480		31.5604	20.3932	12.0514	8.08399	0	0		Uncharacterized protein	Photinus pyralis	A0A1Y1NK55	6.60e-106	DNA polymerase type B, organellar and viral	PF03175
	contig_169053		2.57237	10.1144	3.9915	15.4931	0	0	CS pos: 21-22 GHS-QG Pr: 07950	Uncharacterized protein	Tribolium castaneum	D6WBD2	2.48e-91	DNA/RNA non-specific endonuclease	PF01223
	contig_278019		0	2.34973	41.6187	37.3883	0	0		Uncharacterized protein	Graphocephala atropunctata	A0A1B6KNZ0	3.76e-112	DnaJ domain	PF00226
	contig_57988		0	0	348.007	846.656	0	0						Domain of unknown function (DUF1849)	PF08904
	contig_73716		6.75094	4.68337	12.4551	13.5765	0	0						Domain of unknown function (DUF3336)	PF11815
	contig_354747		5.60016	23.233	2.57838	30.3158	0	0						Domain of unknown function (DUF3361)	PF11841
	contig_256765		38.5431	39.9903	0.368888	0.894561	0	0		NACHT and WD repeat domain-containing protein 2	Agrilus planipennis	A0A1W4XMN4	0.0	Domain of unknown function (DUF4062)	PF13271
	contig_135060		1928.38	2509.69	3573.49	3473.67	0	0		Uncharacterized protein	Oryctes borbonicus	A0A0T6B865	1.39e-16	Domain of unknown function (DUF4430)	PF14478
	contig_134467		3.47388	3.77892	2.2819	1.82147	0	0		Uncharacterized protein	Photinus pyralis	A0A1Y1MUG0	2.78e-119	Domain of unknown function (DUF4485)	PF14846
	contig_37488		41.0826	57.8183	165.521	163.476	0	1		sodium-independent sulfate anion transporter-like	Agrilus planipennis	A0A1W4XDG5	1.70e-21	Domain of unknown function (DUF4580)	PF15162
	contig_231077		24.4985	33.6324	83.4006	68.0931	0	0		uncharacterized protein	Culex quinquefasciatus	B0XJC6	1.92e-13	Domain of unknown function (DUF4619)	PF15398
	contig_161973		4.56726	4.72124	0.994621	1.24114	0	0		Uncharacterized protein	Photinus pyralis	A0A1Y1KSD8	1.70e-111	Domain of unknown function (DUF4746)	PF15928
	contig_179553		0.40951	0	99.2982	54.8594	0	0		Helicase SRCAP	Cyphomyrmex costatus	A0A195C9P0	2.87e-20	Domain of unknown function (DUF4766)	PF15973
	contig_146147		4.43395	7.67051	0.670122	2.54168	0	0	CS pos: 19-20 CNG-GK Pr: 07351	RNA-binding motif protein, X-linked-like-3	Agrilus planipennis	A0A1W4X1Y8	4.60e-46	Domain of unknown function (DUF4779)	PF16009
	contig_264899		10.6183	12.1882	17.9762	16.49	0	0	CS pos: 20-21 ATA-EP Pr: 07003	Uncharacterized protein	Blattella germanica	A0A2P8YD03	6.39e-13	Domain of unknown function (DUF4794)	PF16042
	contig_268872		2.13366	3.2873	2.18725	1.69799	0	1	CS pos: 22-23 VFG-KA Pr: 04611	uncharacterized protein	Culex quinquefasciatus	B0W1D9	1.80e-164	Domain of unknown function (DUF4816)	PF16086
	contig_268867		8.47745	8.75079	9.51342	10.6872	0	0	CS pos: 18-19 TFS-NP Pr: 09370	Uncharacterized protein	Phlebotomus papatasi	A0A1B0CYN5	1.14e-124	Domain of unknown function (DUF4816)	PF16086
	contig_288070		98.0203	114.485	4086.76	3142.3	0	1	CS pos: 22-23 VSA-QR Pr: 08431					Domain of unknown function (DUF4834)	PF16118
	contig_108688		1081.3	1569.17	201.457	266.47	0	0		Uncharacterized protein	Homalodisca liturata	A0A1B6I4H4	3.90e-13	Dos2-interacting transcription regulator of RNA-Pol-II	PF14500
	contig_174047		39.1924	50.5883	13.5891	23.7659	0	0		Uncharacterized protein	Dendroctonus ponderosae	N6UB40	1.09e-26	Dpy-30 motif	PF05186
	contig_228612		30.3871	36.7277	19.2358	24.1386	0	0		Cytoplasmic dynein 2 heavy chain 1-like Protein	Tribolium castaneum	A0A139WJ92	0.0	Dynein heavy chain and region D6 of dynein motor	PF03028
	contig_187828		2.77044	3.30543	0.0475191	0.112265	0	0		Dynein heavy chain, cytoplasmic-like Protein	Tribolium castaneum	D6WU89	0.0	Dynein heavy chain and region D6 of dynein motor	PF03028
	contig_270557		0.840024	1.35196	0.2307	0.408854	0	0		Dynein heavy chain, cytoplasmic-like Protein	Tribolium castaneum	D2A3H9	0.0	Dynein heavy chain and region D6 of dynein motor	PF03028
	contig_40535		17.0726	15.5439	7.19635	5.32792	0	0		Dynein heavy chain, cytoplasmic-like Protein	Tribolium castaneum	D6WIS1	0.0	Dynein heavy chain and region D6 of dynein motor	PF03028
	contig_64090		1.71465	2.52909	0.614919	0.584301	0	0		Dynein heavy chain, cytoplasmic-like Protein	Tribolium castaneum	A0A139WI03	0.0	Dynein heavy chain and region D6 of dynein motor	PF03028
	contig_27689		23.9342	23.4919	9.92564	10.3941	0	0		Uncharacterized protein	Cuerna arida	A0A1B6FQU8	2.12e-77	Dynein heavy chain and region D6 of dynein motor	PF03028
	contig_230109		654.151	869.702	35.5854	19.774	0	0		Putative juvenile hormone-inducible protein	Culex tarsalis	A0A1Q3FKW3	5.89e-16	Ecdysteroid kinase	PF02958
	contig_252680		3130.72	4163.99	2315.64	2077.51	123.517	0						Ecdysteroid kinase	PF02958
	contig_255505		27.1138	32.8425	7.23019	6.16439	0	0		Neurocalcin homolog-like Protein	Tribolium castaneum	A0A139WPA7	2.35e-99	EF hand	PF00036
	contig_218755		0	0	53.5175	10.9462	0	0						EF-hand domain pair	PF13499
	contig_345622		6.40618	5.28806	8.38591	10.3364	0	0	CS pos: 19-20 TEN-KN Pr: 04365	Uncharacterized protein	Photinus pyralis	A0A1Y1MFF0	2.60e-72	Exostosin family	PF03016
	contig_116674		758.829	1087.03	79.1841	65.3224	0	0						FAM176 family	PF14851
	contig_348659		10.8468	10.0015	1.05615	0.268672	0	0		Uncharacterized protein	Photinus pyralis	A0A1Y1MKZ1	2.30e-36	FAM183A and FAM183B related	PF14886
	contig_36802		30.3607	36.2708	16.6755	24.4084	0	0		Uncharacterized protein	Clastoptera arizonana	A0A1B6D7F1	2.79e-51	FAM217 family	PF15344
	contig_291186		27.5564	27.2427	12.4089	18.2919	0	0		Protein FAM92A1-like Protein	Tribolium castaneum	D6WM63	5.32e-99	FAM92 protein	PF06730
	contig_321202		0	0	610.831	405.787	0	0		Alpha-tocopherol transfer protein-like	Bactrocera latifrons	A0A0K8U4I4	2.93e-17	Family of unknown function (DUF5331)	PF17265
	contig_69737		0	0	1635.92	1404	0	0		Uncharacterized protein	Pectinophora gossypiella	A0A1E1WT68	3.01e-17	Family of unknown function (DUF5331)	PF17265
	contig_367042		19.3927	25.2922	42.3938	33.9066	0	0		Fas apoptotic inhibitory molecule 1-like Protein	Tribolium castaneum	D6WRI9	1.03e-80	Fas apoptotic inhibitory molecule (FAIM1)	PF06905
	contig_47536		34.0183	32.9951	44.2531	36.1399	0	3		Fatty acid 2-hydroxylase	Tribolium castaneum	A0A139WEB0	5.01e-137	Fatty acid hydroxylase superfamily	PF04116
	contig_329028		3.01472	3.29821	0.174958	0.206994	0	0		uncharacterized protein LOC108740497 isoform X2	Agrilus planipennis	A0A1W4X2H2	5.07e-14	FlxA-like protein	PF14282
	contig_94447		42.2515	51.7776	44.7173	55.9189	0	0		LisH domain-containing protein FOPNL-like Protein	Tribolium castaneum	A0A139WDG9	8.01e-47	FOP N terminal dimerisation domain	PF09398
	contig_232104		7.55152	6.49964	1106.48	956.733	0	0						Formin Homology Region 1	PF06346
	contig_232106		2.52912	0.921415	312.668	200.717	0	0						Formin Homology Region 1	PF06346
	contig_306485		790.029	1006.78	1925.4	1848.69	0	3		DNA damage-regulated autophagy modulator protein 2-like Protein	Tribolium castaneum	A0A139WMI5	8.63e-24	Frag1/DRAM/Sfk1 family	PF10277
	contig_74388		1.69093	0.15476	4.43162	3.30614	0	1		Uncharacterized protein	Photinus pyralis	A0A1Y1LDQ4	1.14e-137	Fz domain	PF01392
	contig_349312		1809.44	1639.6	1229.95	1256.31	0	0		L-rhamnose-binding lectin ELEL-1	Echinometra lucunter	C0HK24	8.02e-14	Galactose binding lectin domain	PF02140
	contig_349290		1711.26	1471.65	1981.65	2111.02	0	0	CS pos: 13-14 SEG-VL Pr: 05347	Uncharacterized protein	Ciona savignyi	H2ZPP7	4.11e-19	Galactose binding lectin domain	PF02140
	contig_97479		3.96841	4.22259	9.14067	10.279	0	2		Hexosyltransferase	Agrilus planipennis	A0A1W4WYY7	3.97e-77	Galactosyltransferase	PF01762
	contig_371699		2.92209	2.28591	3.92867	2.55446	0	1		gamma-glutamyltranspeptidase 1-like isoform X2	Agrilus planipennis	A0A1W4WGT8	0.0	Gamma-glutamyltranspeptidase	PF01019
	contig_151549		2.5845	0.902447	13.5118	4.41727	0	0		Uncharacterized protein	Photinus pyralis	A0A1Y1MGD2	2.13e-104	Gamma-glutamyltranspeptidase	PF01019
	contig_221005		37.0933	33.644	113.631	95.2244	0	0		GDP-mannose 4,6 dehydratase	Cryptotermes secundus	A0A2J7QU02	5.59e-53	GDP-mannose 4,6 dehydratase	PF16363
	contig_282161		257.775	337.455	69.2588	59.0161	0	0		Uncharacterized protein	Oncopeltus fasciatus	A0A2R7W4U9	1.21e-20	Glutathione S-transferase, N-terminal domain	PF13417
	contig_289849		0.709587	0.875937	0	3.92785	0	0	CS pos: 22-23 SLA-AE Pr: 06458	Zinc finger protein 512B	Papilio machaon	A0A0N1PG55	6.25e-115	Glycine rich protein family	PF07172
	contig_150634		185.933	228.739	35.9102	32.3342	0	0						Glycosyl hydrolase family 7	PF00840
	contig_205170		5.83963	0.156294	8.79231	0.0773324	0	1		probable chitinase 3 isoform X1	Agrilus planipennis	A0A1W4XGE2	0.0	Glycosyl hydrolases family 18	PF00704
	contig_51806		1.46491	1.19874	3.11678	2.28594	0	1		Polypeptide N-acetylgalactosaminyltransferase	Photinus pyralis	A0A1Y1JSS5	0.0	Glycosyl transferase family 2	PF00535
	contig_14515		1.16762	1.33227	5.55443	3.94063	0	1	CS pos: 13-14 VYG-KT Pr: 01897	Uncharacterized protein	Anopheles darlingi	W5JAY1	2.33e-57	Glycosylphosphatidylinositol-anchored merozoite surface protein	PF11641
	contig_177356		14.3726	22.2513	29.9756	26.6716	0	1		Alpha-(1,3)-fucosyltransferase C-like Protein	Tribolium castaneum	D6WT65	3.32e-102	Glycosyltransferase family 10 (fucosyltransferase) C-term	PF00852
	contig_249890		2.27191	1.89682	1.66907	1.44128	0	1		Uncharacterized protein	Tribolium castaneum	D2A5K9	0.0	Glycosyltransferase family 92	PF01697
	contig_340529		48.5165	72.3204	225.856	260.863	0	0						Glypican	PF01153
	contig_126525		1.66265	0.873806	2.15477	2.03359	0	0		Glucose dehydrogenase [FAD, quinone]	Cryptotermes secundus	A0A2J7RBH7	0.0	GMC oxidoreductase	PF00732
	contig_234453		2.20518	3.15177	1.51987	2.65911	0	1		Uncharacterized protein	Nasonia vitripennis	K7J279	0.0	GMC oxidoreductase	PF00732
	contig_333001		1123.52	1111.73	1452.34	1412.36	0	0		Uncharacterized protein	Operophtera brumata	A0A0L7LTW1	1.37e-15	GMC oxidoreductase	PF05199
	contig_302761		169.868	218.286	127.965	160.594	0	0		Uncharacterized protein	Photinus pyralis	A0A1Y1N5D4	3.06e-60	GMC oxidoreductase	PF00732
	contig_296782		66.1805	77.7527	69.5862	59.7772	0	5		Elongation of very long chain fatty acids protein	Tribolium castaneum	A0A139WC30	4.77e-160	GNS1/SUR4 family	PF01151
	contig_106595		6.85116	8.49537	40.4633	47.098	0	1		Uncharacterized protein	Photinus pyralis	A0A1Y1KMB4	3.33e-13	GPCR proteolysis site, GPS, motif	PF01825
	contig_33052		347.128	365.196	9326.79	8118.63	0	0	CS pos: 22-23 SYM-EK Pr: 03266	Hemolymph juvenile hormone-binding protein	Oryctes borbonicus	A0A0T6BGH2	1.24e-30	Haemolymph juvenile hormone binding protein (JHBP)	PF06585
	contig_273187		1.00947	1.68507	8.99177	6.2528	0	0	CS pos: 20-21 CRA-EL Pr: 09257	Protein takeout	Lygus hesperus	A0A0A9X583	2.84e-25	Haemolymph juvenile hormone binding protein (JHBP)	PF06585
	contig_377760		98.8271	88.0281	84.9808	115.437	0	0	CS pos: 20-21 AEG-LK Pr: 08915	Protein takeout	Lygus hesperus	A0A0A9X583	3.81e-25	Haemolymph juvenile hormone binding protein (JHBP)	PF06585
	contig_348994		105.681	109.188	377.288	324.734	0	0		Protein takeout	Lygus hesperus	A0A146L3S1	6.06e-14	Haemolymph juvenile hormone binding protein (JHBP)	PF06585
	contig_136754		2451.74	2784.48	330.322	473.682	0	0		protein takeout-like	Agrilus planipennis	A0A1W4XF12	5.21e-14	Haemolymph juvenile hormone binding protein (JHBP)	PF06585
	contig_377768		128.157	117.5	80.6868	150.243	0	0		protein takeout-like	Agrilus planipennis	A0A1W4XF12	7.35e-19	Haemolymph juvenile hormone binding protein (JHBP)	PF06585
	contig_80507		561.009	528.536	3911.41	3357.04	0	0		Protein takeout-like Protein	Tribolium castaneum	D2A5D1	2.82e-21	Haemolymph juvenile hormone binding protein (JHBP)	PF06585
	contig_117924		264.531	305.257	682.274	628.12	0	0	CS pos: 16-17 ATA-YL Pr: 07594	SFRICE_029276	Spodoptera frugiperda	A0A2H1W415	2.50e-25	Haemolymph juvenile hormone binding protein (JHBP)	PF06585
	contig_320962		3.16235	4.74986	4.58464	4.24339	0	1		Uncharacterized protein	Dendroctonus ponderosae	J3JUL1	1.97e-38	Haemolymph juvenile hormone binding protein (JHBP)	PF06585
	contig_78839		2.39388	1.76937	12.5237	4.87136	0	0	CS pos: 29-30 VNT-QQ Pr: 06252	Uncharacterized protein	Graphocephala atropunctata	A0A1B6KR01	1.00e-120	Haemolymph juvenile hormone binding protein (JHBP)	PF06585
	contig_80510		118.966	133.57	1056.81	934.908	0	0		Uncharacterized protein	Heliothis virescens	A0A2A4JRG2	1.06e-18	Haemolymph juvenile hormone binding protein (JHBP)	PF06585
	contig_96799		1210.47	1430.47	3189.35	2937.03	0	0	CS pos: 36-37 IEG-VK Pr: 05008	Uncharacterized protein	Clastoptera arizonana	A0A1B6CN67	1.72e-11	Haemolymph juvenile hormone binding protein (JHBP)	PF06585
	contig_80508		321.541	359.315	2843.21	2445.08	0	0		Uncharacterized protein	Heliothis virescens	A0A2A4JRG2	5.00e-30	Haemolymph juvenile hormone binding protein (JHBP)	PF06585
	contig_173532		509.424	639.658	1745.37	1866.26	0	0		Uncharacterized protein	Photinus pyralis	A0A1Y1K5S1	5.38e-38	Haemolymph juvenile hormone binding protein (JHBP)	PF06585
	contig_60570		5.41729	8.54872	10.8832	11.9876	0	1		Uncharacterized protein	Dendroctonus ponderosae	N6SS10	2.11e-34	Haemolymph juvenile hormone binding protein (JHBP)	PF06585
	contig_337728		1273.23	1717.36	23901.7	24911.5	0	0	CS pos: 14-15 SHS-YK Pr: 07967	Uncharacterized protein	Graphocephala atropunctata	A0A1B6L1G2	1.68e-15	Haemolymph juvenile hormone binding protein (JHBP)	PF06585
	contig_33050		358.155	406.528	11182.5	10034	0	0		Uncharacterized protein	Clastoptera arizonana	A0A1B6DHY8	2.26e-14	Haemolymph juvenile hormone binding protein (JHBP)	PF06585
	contig_173514		353.402	433.567	1263.93	1258.57	0	0	CS pos: 19-20 GNS-DD Pr: 05844	uncharacterized protein LOC108734160 isoform X2	Agrilus planipennis	A0A1W4WM13	3.76e-16	Haemolymph juvenile hormone binding protein (JHBP)	PF06585
	contig_337730		1355.19	1621.79	26469.9	32730	0	0	CS pos: 21-22 SHS-YK Pr: 08613					Haemolymph juvenile hormone binding protein (JHBP)	PF06585
	contig_211697		0.568317	0.524533	2.81512	2.88452	0	0		Uncharacterized protein	Poecilia formosa	A0A096MF30	9.69e-161	hAT family C-terminal dimerisation region	PF05699
	contig_330629		0.943357	0.841885	0.835579	0.773258	0	12		Anion exchange protein	Photinus pyralis	A0A1Y1MZV6	0.0	HCO3- transporter family	PF00955
	contig_215313		18.1862	22.056	5.03845	5.8944	0	0		48 related 1	Tribolium castaneum	D6WK93	5.68e-94	Helix-loop-helix DNA-binding domain	PF00010
	contig_134504		17.269	20.7943	9.24274	8.59356	0	0		Putative twist	Leptinotarsa decemlineata	A0A0K0PQZ8	3.17e-88	Helix-loop-helix DNA-binding domain	PF00010
	contig_146589		29.9297	13.5941	39.7129	21.709	0	0		matrix metalloproteinase-14-like	Agrilus planipennis	A0A1W4XG61	3.27e-73	Hemopexin	PF00045
	contig_289622		587.664	572.385	3319.97	3001.54	0	0		Prostatic acid phosphatase-like isoform X1	Sogatella furcifera	A0A1S6J0Y8	1.15e-21	Histidine phosphatase superfamily (branch 2)	PF00328
	contig_213521		82.2317	97.1412	91.7546	105.432	0	0	CS pos: 19-20 ASG-QK Pr: 09276	Uncharacterized protein	Aedes aegypti	A0A1S4F611	1.27e-100	Histidine phosphatase superfamily (branch 2)	PF00328
	contig_289620		1071.29	1144.37	6421.57	5948.37	0	0		Venom acid phosphatase Acph-1-like Protein	Tribolium castaneum	D2A1N0	8.54e-22	Histidine phosphatase superfamily (branch 2)	PF00328
	contig_35085		4.59879	4.03029	52.9939	44.3239	0	1						Histidine phosphatase superfamily (branch 2)	PF00328
	contig_358825		1.5357	0.697444	57.9193	44.4582	0	0						HMG (high mobility group) box	PF00505
	contig_285747		0	0	4.39891	6.51215	0	0		Deformed	Tribolium castaneum	D6W938	3.61e-113	Homeobox domain	PF00046
	contig_280978		12.0081	13.8078	31.7439	27.5553	0	0		Homeobox protein aristaless-like Protein	Tribolium castaneum	A0A139WH33	8.20e-97	Homeobox domain	PF00046
	contig_169707		0	0	3.93193	4.2681	0	0		Proboscipedia	Tribolium castaneum	D6W944	7.43e-174	Homeobox domain	PF00046
	contig_185422		189.653	212.604	11.19	10.6014	0	0		Retinal homeobox protein Rx-like Protein	Tribolium castaneum	D6W9T0	5.58e-55	Homeobox domain	PF00046
	contig_47633		1.636	1.21373	5.16819	5.0044	0	0		uncharacterized protein LOC108741814	Agrilus planipennis	A0A1W4X826	2.92e-170	Homeobox domain	PF00046
	contig_191261		221.571	137.032	420.346	341.017	0	0		Uncharacterized protein	Dendroctonus ponderosae	N6TY70	9.51e-32	homogentisate 1,2-dioxygenase	PF04209
	contig_96217		2.58317	4.71045	0.408219	1.36053	0	0		uncharacterized protein LOC108742207 isoform X1	Agrilus planipennis	A0A1W4X9T9	2.72e-53	Immunity protein 30	PF15565
	contig_205249		27.7599	30.8278	15.4125	11.7492	0	0		Neural/ectodermal development factor IMP-L2-like Protein	Tribolium castaneum	D2A446	1.87e-57	Immunoglobulin domain	PF13927
	contig_18428		0.142284	0	70.7263	0.130355	0	1	CS pos: 24-25 ARA-GN Pr: 08509	AAEL009802-PA	Aedes aegypti	Q16UU3	2.37e-47	Insect cuticle protein	PF00379
	contig_18426		0	0	28.223	0	0	0		Cuticle protein	Habropoda laboriosa	A0A0L7QWA1	5.22e-25	Insect cuticle protein	PF00379
	contig_188866		33.2725	33.0958	145.226	108.389	0	0		Cuticular protein	Nilaparvata lugens	A0A2S1ZS83	6.21e-19	Insect cuticle protein	PF00379
	contig_210173		88.2323	45.4967	28.4034	7.56168	0	0	CS pos: 16-17 VQA-RP Pr: 08404	endocuticle structural glycoprotein SgAbd-2-like	Agrilus planipennis	A0A1W4XNX4	8.78e-35	Insect cuticle protein	PF00379
	contig_153358		25.8546	4.04283	48.8257	28.5846	0	0		endocuticle structural glycoprotein SgAbd-2-like isoform X2	Agrilus planipennis	A0A1W4XNY4	4.42e-51	Insect cuticle protein	PF00379
	contig_153352		16.809	0	17.4089	0	0	0	CS pos: 21-22 ASA-AQ Pr: 06670	Larval cuticle protein 5-like Protein	Tribolium castaneum	D6WP14	6.30e-51	Insect cuticle protein	PF00379
	contig_219002		196.549	191.194	508.016	277.252	0	0		Lens protein 10	Thermonectus marmoratus	A0A291S1F2	1.20e-34	Insect cuticle protein	PF00379
	contig_329178		312.622	378.3	453.443	285.059	0	0		Lens protein 10	Thermonectus marmoratus	A0A291S1F2	1.85e-11	Insect cuticle protein	PF00379
	contig_329173		124.247	109.948	163.064	102.032	0	0		Lens protein 10	Thermonectus marmoratus	A0A291S1F2	4.90e-19	Insect cuticle protein	PF00379
	contig_352128		16.4637	6.99015	26.2289	7.10074	0	1	CS pos: 32-33 AIA-AP Pr: 04345	Putative cuticular protein 30 rr-1 family	Anopheles aquasalis	T1EAJ9	1.90e-17	Insect cuticle protein	PF00379
	contig_213906		31.8839	19.5543	7.32726	6.30157	0	0	CS pos: 15-16 CSS-VP Pr: 07373	Putative endocuticle structural glycoprotein sgabd-2	Nyssomyia neivai	A0A1L8E3A4	3.79e-44	Insect cuticle protein	PF00379
	contig_159309		166.04	174.737	273.482	263.537	0	1	CS pos: 23-24 VDC-KP Pr: 08729	Uncharacterized protein	Blattella germanica	A0A2P8ZAB7	1.54e-20	Insect cuticle protein	PF00379
	contig_57844		65.4809	62.6364	8.72009	11.9583	0	1	CS pos: 30-31 ALA-AP Pr: 05129	Uncharacterized protein	Phlebotomus papatasi	A0A1B0GNX6	4.90e-46	Insect cuticle protein	PF00379
	contig_153359		49.6368	41.4367	43.2861	10.2339	0	0	CS pos: 16-17 VSA-DV Pr: 08989	Uncharacterized protein	Photinus pyralis	A0A1Y1M0T0	3.90e-21	Insect cuticle protein	PF00379
	contig_58644		4.08624	2.71164	6.62941	5.82789	0	0	CS pos: 19-20 CSC-LE Pr: 07100	Uncharacterized protein	Tribolium castaneum	A0A139WLI2	5.15e-57	Insect cuticle protein	PF00379
	contig_108439		25.7026	39.4882	26.3074	25.4195	0	0		Uncharacterized protein	Dendroctonus ponderosae	U4UNR5	1.15e-80	Insect cuticle protein	PF00379
	contig_329169		81.731	47.3909	141.703	27.562	0	0						Insect cuticle protein	PF00379
	contig_329172		343.393	446.145	668.21	316.16	0	0						Insect cuticle protein	PF00379
	contig_229636		4.95085	11.4869	4.73824	10.3965	0	0		Integrase core domain protein	Lasius niger	A0A0J7K7P3	1.91e-57	Integrase core domain	PF00665
	contig_274241		10.1289	6.40862	1.83031	2.33944	0	0						Interleukin 15	PF02372
	contig_63926		1.66337	4.8051	0	5.88655	0	0						Intermediate filament protein	PF00038
	contig_240070		6.43932	5.19323	1.30376	1.73752	0	6		Open rectifier potassium channel protein 1	Papilio machaon	A0A194QST4	9.26e-105	Ion channel	PF07885
	contig_171862		33.869	29.103	23.2016	24.8229	0	0		Uncharacterized protein	Photinus pyralis	A0A1Y1KIG7	3.41e-37	Ion channel	PF07885
	contig_99485		1.14426	0.60462	2.90472	2.42853	0	10		UNC93-like protein MFSD11	Cryptotermes secundus	A0A2J7QD95	0.0	Ion channel regulatory protein UNC-93	PF05978
	contig_301703		13.2052	9.39503	19.2796	17.2585	0	6		Uncharacterized protein	Photinus pyralis	A0A1Y1NB36	0.0	Ion channel regulatory protein UNC-93	PF05978
	contig_57971		6.03401	8.6778	1.34542	1.97046	0	0		Uncharacterized protein	Photinus pyralis	A0A1Y1LBE4	3.93e-51	IQ calmodulin-binding motif	PF00612
	contig_212758		106.233	260.361	131.559	242.758	0	0						Kazal-type serine protease inhibitor domain	PF07648
	contig_63972		0	0	2.30435	0.568428	0	0		Uncharacterized protein	Bactrocera latifrons	A0A0K8W0F1	1.03e-128	KELK-motif containing domain of MRCK Ser/Thr protein kinase	PF15796
	contig_179575		1.0313	1.72263	2.00234	6.07508	0	1	CS pos: 30-31 SFA-EE Pr: 07889	titin-like	Agrilus planipennis	A0A1W4WIP6	3.76e-22	Keratin type II head	PF16208
	contig_302189		2552.11	47.6556	2936.46	6.66416	0	2	CS pos: 21-22 ATC-EE Pr: 08144					Keratin type II head	PF16208
	contig_260463		1.4753	1.33617	157.196	53.2439	0	0	CS pos: 23-24 SLA-EE Pr: 08929					Keratin type II head	PF16208
	contig_284298		677.879	59.3942	342.088	41.2101	0	1	CS pos: 21-22 ASA-GH Pr: 07754					Keratin-associated matrix	PF11759
	contig_120781		14.9489	19.6717	15.1521	17.8992	0	0		Uncharacterized protein	Photinus pyralis	A0A1Y1NDX2	7.32e-20	KIAA1430 homologue	PF13879
	contig_30226		4.50415	2.59605	4.2926	1.0264	0	0		L-lactate dehydrogenase	Camponotus floridanus	E2AWN0	7.30e-165	lactate/malate dehydrogenase, NAD binding domain	PF00056
	contig_55129		4.53463	4.65842	2.76707	2.01313	0	0		fat-like cadherin-related tumor suppressor homolog	Agrilus planipennis	A0A1W4WRH2	0.0	Laminin G domain	PF02210
	contig_239819		14.3802	16.5624	18.0686	17.4831	0	0		Uncharacterized protein	Photinus pyralis	A0A1Y1L8M8	0.0	Laminin G domain	PF02210
	contig_239851		22.434	23.0246	15.281	23.1796	0	0		Uncharacterized protein	Oryctes borbonicus	A0A0T6B2M9	1.32e-47	Laminin G domain	PF02210
	contig_187327		0.582856	0	16.2826	9.17514	0	0	CS pos: 28-29 ALA-EE Pr: 07245					Lamprin	PF06403
	contig_210953		5.19664	3.27495	2.2821	1.90491	0	1	CS pos: 25-26 VWA-RN Pr: 09600	Connectin-like Protein	Tribolium castaneum	D1ZZZ7	2.66e-176	Leucine rich repeat	PF13855
	contig_210821		1.34556	1.2941	1.97437	1.88268	0	1		Insulin-like growth factor-binding protein complex acid labile chain	Zootermopsis nevadensis	A0A067QIL7	1.81e-149	Leucine rich repeat	PF13855
	contig_271476		3.15149	2.00968	1.22547	2.61939	0	0		leucine-rich repeat-containing protein 34-like	Agrilus planipennis	A0A1W4X9D5	9.57e-127	Leucine Rich repeat	PF13516
	contig_136173		1.66072	1.78712	2.67297	1.84656	0	0		Uncharacterized protein	Photinus pyralis	A0A1Y1NEG1	0.0	Leucine Rich repeat	PF13516
	contig_302006		4.82439	5.48685	0.292044	0.431197	0	0	CS pos: 20-21 ALA-QL Pr: 06144	Uncharacterized protein	Tribolium castaneum	A0A139WH03	0.0	Leucine rich repeat	PF13855
	contig_138578		3.89429	4.22118	1.8169	1.2524	0	1	CS pos: 20-21 ALA-QC Pr: 09575	Uncharacterized protein	Tribolium castaneum	D6WL61	0.0	Leucine rich repeat	PF13855
	contig_40167		52.8645	52.0798	218.429	278.918	0	1	CS pos: 20-21 IKG-RQ Pr: 07817	Uncharacterized protein	Photinus pyralis	A0A1Y1LTR4	8.56e-36	Leucine rich repeat	PF13855
	contig_59335		4.34083	4.82082	1.06602	1.63617	0	0		Uncharacterized protein	Photinus pyralis	A0A1Y1LD48	3.50e-50	Leucine rich repeat	PF13855
	contig_358055		10.6412	17.3983	1.64519	1.79241	0	0		Dynein light chain 1, axonemal-like Protein	Tribolium castaneum	D6WR95	5.96e-96	Leucine Rich repeats (2 copies)	PF12799
	contig_354780		9.15578	45.585	4.93928	51.4934	0	0						Leucine Rich repeats (2 copies)	PF12799
	contig_102075		6.66811	1.27068	8.24367	2.29545	0	1		Leucine-rich repeat-containing protein 51	Dufourea novaeangliae	A0A154PGK4	5.64e-48	Leucine-rich repeat	PF14580
	contig_194857		9.74167	10.7508	7.09716	6.55796	0	0		protein phosphatase 1 regulatory subunit SDS22	Agrilus planipennis	A0A1W4X4Y7	2.42e-52	Leucine-rich repeat	PF14580
	contig_254298		17.2931	2.4605	0	2.52112	0	0						Leukocyte receptor CD45	PF12567
	contig_195462	RsutIR75d	13.263	15.0593	3.04614	3.18166	0	2		Glutamate receptor 1-like Protein	Tribolium castaneum	D6X2Y3	8.55e-74	Ligand-gated ion channel	PF00060
	contig_46108	RsutIR41a	8.02813	8.49956	0.467012	0.310796	0	3		Ionotropic receptor	Eogystia hippophaecolus	A0A1B3P5G1	2.39e-114	Ligand-gated ion channel	PF00060
	contig_15048	RsutIR21a	3.19056	3.3918	0	0	0	2	CS pos: 22-23 IES-KF Pr: 08361	Ionotropic receptor 4	Pyrrhalta maculicollis	A0A1J0KKK1	1.11e-168	Ligand-gated ion channel	PF00060
	contig_278250	RsutIR123	2.41815	0.684893	1.67683	2.33157	0	3	CS pos: 19-20 ANG-NQ Pr: 07400	Ionotropic receptor 568	Blattella germanica	A0A2P8XE02	6.25e-55	Ligand-gated ion channel	PF00060
	contig_103484	RsutIR127	0.723468	1.07512	2.41847	3.28586	0	3	CS pos: 24-25 IFC-DT Pr: 08496	Ionotropic receptor 569	Blattella germanica	A0A2P8YQJ2	1.05e-49	Ligand-gated ion channel	PF00060
	contig_220517	RsutIR131	1.02541	1.44525	14.5896	13.661	0	3	CS pos: 19-20 SKA-SK Pr: 08698	Ionotropic receptor 569	Blattella germanica	A0A2P8YQJ2	1.27e-48	Ligand-gated ion channel	PF00060
	contig_304260	RsutIR130	18.0247	20.1287	0	0	0	2		Ionotropic receptor 569	Blattella germanica	A0A2P8YQJ2	7.69e-30	Ligand-gated ion channel	PF00060
	contig_110893	RsutIR125	0.271869	0.0953764	4.09823	3.84571	0	4	CS pos: 16-17 VSS-QN Pr: 07357	Ionotropic receptor 573	Blattella germanica	A0A2P8YCF0	8.28e-37	Ligand-gated ion channel	PF00060
	contig_325398	RsutIR75d	12.934	15.8399	4.13296	2.51051	0	1		Ionotropic receptor 75q.2	Helicoverpa assulta	A0A0B5A3J3	3.74e-60	Ligand-gated ion channel	PF00060
	contig_221485	RsutIR75e	22.6154	23.8322	18.8545	20.2199	0	4		Ionotropic receptor IR2	Colaphellus bowringi	A0A0S3J2Z8	4.01e-130	Ligand-gated ion channel	PF00060
	contig_238941	RsutIR75f	36.1897	39.2144	23.431	23.5895	0	1		Ionotropic receptor onIR75s	Dendroctonus ponderosae	R9PST2	7.80e-32	Ligand-gated ion channel	PF00060
	contig_56068	RsutIR75b	5.19922	4.71835	0	0.0646827	0	4	CS pos: 19-20 SKS-VE Pr: 05341	Putative ionotropic receptor IR75q.2	Hedya nubiferana	A0A223HCX7	4.91e-115	Ligand-gated ion channel	PF00060
	contig_284168	RsutIR68a	3.90829	4.86284	0.0378663	0	0	5		Uncharacterized protein	Zootermopsis nevadensis	A0A067RDK9	0.0	Ligand-gated ion channel	PF00060
	contig_238435	RsutIR118	0	0	5.75186	4.6534	0	4		Uncharacterized protein	Tribolium castaneum	D6X110	1.01e-24	Ligand-gated ion channel	PF00060
	contig_16649	RsutIR128	2.83397	4.21103	0.508794	0.322648	0	4		Uncharacterized protein	Zootermopsis nevadensis	A0A067R6W7	1.65e-32	Ligand-gated ion channel	PF00060
	contig_73985	RsutIR111	1.51633	1.57011	3.41677	4.65083	0	3	CS pos: 18-19 TNA-LI Pr: 08995	Uncharacterized protein	Drosophila willistoni	B4NB23	3.52e-20	Ligand-gated ion channel	PF00060
	contig_209389	RsutIR101	0.190511	0.0935501	2.06875	1.55748	0	3		Uncharacterized protein	Zootermopsis nevadensis	A0A067QZW1	8.41e-51	Ligand-gated ion channel	PF00060
	contig_155013	RsutIR119	8.45231	9.74811	10.9248	13.2118	0	2		Uncharacterized protein	Tribolium castaneum	D6X110	2.23e-25	Ligand-gated ion channel	PF00060
	contig_41838		28.0355	28.0015	6.64344	9.17982	0	1		Uncharacterized protein	Tribolium castaneum	D6WIG7	7.26e-30	Ligand-gated ion channel	PF00060
	contig_39110		3.3996	2.21999	4.53923	4.67119	0	3		Uncharacterized protein	Clastoptera arizonana	A0A1B6D521	7.17e-22	Ligand-gated ion channel	PF00060
	contig_220636	RsutIR75a	4.65141	5.03339	17.332	28.2787	0	0	CS pos: 18-19 SDG-IL Pr: 03483	GRID2 protein	Fopius arisanus	A0A0C9QXU0	1.02e-22	Ligated ion channel L-glutamate- and glycine-binding site	PF10613
	contig_277034	RsutIR8a	30.4582	31.0779	1.15631	2.61117	0	1		Ionotropic receptor 1	Holotrichia parallela	A0A2P9JY84	3.11e-75	Ligated ion channel L-glutamate- and glycine-binding site	PF10613
	contig_238940	RsutIR75f	90.2065	91.7927	45.1544	50.9555	0	1		Ionotropic receptor IR2	Colaphellus bowringi	A0A0S3J2Z8	9.97e-57	Ligated ion channel L-glutamate- and glycine-binding site	PF10613
	contig_295119	RsutIR104	3.94925	3.24485	3.35135	4.02601	0	3		Uncharacterized protein	Aedes aegypti	A0A1S4G3Z8	1.74e-30	Ligated ion channel L-glutamate- and glycine-binding site	PF10613
	contig_225164		1.74363	1.61232	4.69224	3.3702	0	0		Uncharacterized protein	Photinus pyralis	A0A1Y1KUH9	0.0	LIM domain	PF00412
	contig_143487		0.249204	5.05647	0.255798	4.39257	0	0		Histone h1	Lasius niger	A0A0J7KFD4	1.85e-11	linker histone H1 and H5 family	PF00538
	contig_284122		58.0543	69.6883	8745.33	9877.8	0	0		PNLIPRP2_0 protein	Fopius arisanus	A0A0C9RCJ3	1.76e-37	Lipase	PF00151
	contig_329878		1.22507	0.912783	104.197	87.5555	0	0	CS pos: 17-18 VSC-GC Pr: 05214	Uncharacterized protein	Apis mellifera	A0A088AM94	9.99e-30	Lipase	PF00151
	contig_129485		146.414	186.156	1709.44	1873.62	0	0		Ves G 1 allergen precursor, putative	Pediculus humanus subsp. corporis	E0VE21	5.32e-22	Lipase	PF00151
	contig_62870		47.6676	67.8441	0.494644	0	0	0		Uncharacterized protein	Blattella germanica	A0A2P8ZJ98	2.92e-32	Lustrin, cysteine-rich repeated domain	PF14625
	contig_176499		2303.77	3480.93	1135.01	2263.08	0	0						Lysozyme-like	PF13702
	contig_284800		8.42951	4.82767	34.9057	35.3486	0	0		Uncharacterized protein	Tribolium castaneum	D7EHT7	4.57e-105	Lytic polysaccharide mono-oxygenase, cellulose-degrading	PF03067
	contig_44123		12.1106	12.1761	19.6743	16.1923	0	3		homeobox protein 2 isoform X3	Agrilus planipennis	A0A1W4WV32	2.27e-104	Major Facilitator Superfamily	PF07690
	contig_51166		18.6212	27.206	37.2986	46.4675	0	2		Membrane transporter	Oryctes borbonicus	A0A0T6B3N9	3.45e-71	Major Facilitator Superfamily	PF07690
	contig_221351		1.30223	0.511491	3.21682	3.01622	0	11		Putative inorganic phosphate cotransporter-like Protein	Tribolium castaneum	A0A139WGN8	0.0	Major Facilitator Superfamily	PF07690
	contig_369152		23.1596	16.7017	33.7643	15.4951	0	4		Putative inorganic phosphate cotransporter-like Protein	Tribolium castaneum	D6WVB6	6.16e-65	Major Facilitator Superfamily	PF07690
	contig_51179		90.5425	99.2989	168.12	155.988	0	1		Putative inorganic phosphate cotransporter-like Protein	Tribolium castaneum	D6WN85	7.41e-25	Major Facilitator Superfamily	PF07690
	contig_369155		39.8274	56.8183	64.2824	58.0756	0	3		sialin	Agrilus planipennis	A0A1W4XM54	5.72e-30	Major Facilitator Superfamily	PF07690
	contig_301682		6.30315	10.6933	9.44049	10.8568	0	3		UNC93-like protein	Harpegnathos saltator	E2BF15	1.22e-75	Major Facilitator Superfamily	PF07690
	contig_197025		12.3785	7.52785	4.73105	4.67639	0	10		Uncharacterized protein	Photinus pyralis	A0A1Y1KTX3	0.0	Major Facilitator Superfamily	PF07690
	contig_208228		131.925	164.874	133.004	135.586	0	1		Uncharacterized protein	Photinus pyralis	A0A1Y1LHH1	1.21e-24	Major Facilitator Superfamily	PF07690
	contig_369149		43.1589	36.3936	142.203	71.8	0	1		Uncharacterized protein	Photinus pyralis	A0A1Y1LHH1	1.86e-15	Major Facilitator Superfamily	PF07690
	contig_305535		4.20923	6.49062	5.16737	6.28392	0	2		Fatty acyl-CoA reductase	Tribolium castaneum	D2A5A7	2.82e-75	Male sterility protein	PF03015
	contig_234638		8.63596	8.14538	11.572	11.4132	0	0		Fatty acyl-CoA reductase	Tribolium castaneum	D2A3T2	6.36e-70	Male sterility protein	PF07993
	contig_234761		6.60107	8.56424	12.2924	15.8073	0	8		Sterol O-acyltransferase 1	Habropoda laboriosa	A0A0L7QUM8	2.44e-82	MBOAT, membrane-bound O-acyltransferase family	PF03062
	contig_210794		27.0076	29.9929	14.6218	22.5981	0	4		Uncharacterized protein	Cryptotermes secundus	A0A2J7REI3	8.39e-158	Meckelin (Transmembrane protein 67)	PF09773
	contig_120342		1.57584	1.86938	3.36151	2.69659	0	0		Dipeptidase	Tribolium castaneum	D6WFQ4	0.0	Membrane dipeptidase (Peptidase family M19)	PF01244
	contig_326647		1.72308	3.42738	2.43794	3.24294	0	4		Uncharacterized protein	Photinus pyralis	A0A1Y1LF33	1.93e-122	Membrane-associating domain	PF01284
	contig_87895		207.05	252.93	712.589	741.742	0	0		Uncharacterized protein	Cuerna arida	A0A1B6G4Y2	1.64e-16	Merozoite surface antigen 2c	PF12238
	contig_134149		9.09624	19.2661	2.30921	5.3767	0	0		Juvenile hormone acid methyltransferase	Leptinotarsa decemlineata	A0A0H4SZT2	9.94e-50	Methyltransferase domain	PF13847
	contig_228600		1.82739	2.30932	1.06285	1.22436	0	0		Cytoplasmic dynein 2 heavy chain 1-like Protein	Tribolium castaneum	A0A139WIZ7	0.0	Microtubule-binding stalk of dynein motor	PF12777
	contig_25800		4.22934	4.53706	1.77719	1.81959	0	0		Dynein heavy chain, cytoplasmic-like Protein	Tribolium castaneum	D6W7L1	0.0	Microtubule-binding stalk of dynein motor	PF12777
	contig_172020		4.54387	4.35773	12.98	10.8274	0	0	CS pos: 20-21 AQA-VR Pr: 07169	Uncharacterized protein	Photinus pyralis	A0A1Y1MUB4	0.0	Multicopper oxidase	PF07732
	contig_84032		22.8863	24.7384	2.98809	2.66194	0	0		Zinc finger MYND domain-containing protein 10	Blattella germanica	A0A2P8ZJC3	4.00e-56	MYND finger	PF01753
	contig_56271		101.269	110.319	202.117	215.699	0	0		Peptidoglycan-recognition protein	Musca domestica	T1PIP5	1.12e-30	N-acetylmuramoyl-L-alanine amidase	PF01510
	contig_60717		0	0	3.50554	10.6215	0	0	CS pos: 23-24 SWS-ED Pr: 03919					NB-ARC domain	PF00931
	contig_215108		2.47104	1.91497	0.835681	1.16087	0	1		Uncharacterized protein	Photinus pyralis	A0A1Y1NGR0	0.0	NDT80 / PhoG like DNA-binding family	PF05224
	contig_329825		45.6834	59.1953	55.5884	67.5437	0	0		Neural proliferation differentiation and control protein 1-like protein	Tribolium castaneum	A0A139WKC1	1.06e-45	Neural proliferation differentiation control-1 protein (NPDC1)	PF06809
	contig_66588		16.19	16.035	11.1569	11.8736	0	0	CS pos: 22-23 ASS-RT Pr: 06885	Uncharacterized protein	Cryptotermes secundus	A0A2J7PYY8	1.09e-58	Neurotransmitter-gated ion-channel ligand binding domain	PF02931
	contig_257501		4.04616	3.24918	4.31538	2.45853	0	0		Nitric oxide synthase	Philanthus triangulum	A0A0K0LJ26	3.27e-168	Nitric oxide synthase, oxygenase domain	PF02898
	contig_143171		12.4662	10.6759	11.3371	9.67173	0	0		Uncharacterized protein	Zootermopsis nevadensis	A0A067R8T2	6.42e-47	Oestrogen receptor	PF02159
	contig_90251		2.05744	3.81654	39.2041	38.5644	0	0						OSK domain	PF17182
	contig_24084		12.7915	14.6218	1.57589	2.04741	0	0		Eyegone	Tribolium castaneum	D2A0W2	0.0	'Paired box' domain	PF00292
	contig_309883		2.52866	3.48508	7.62373	10.5581	0	0		Uncharacterized protein	Tribolium castaneum	A0A139WEU2	1.63e-73	PAN domain	PF00024
	contig_250337		60.5354	34.2397	53.7318	32.6244	0	0		Uncharacterized protein	Tribolium castaneum	A0A139WEU2	3.91e-80	PAN domain	PF00024
	contig_294461		2.51126	2.78878	6.35898	4.79028	0	0		Uncharacterized protein	Lasius niger	A0A0J7NTZ9	0.0	PAN domain	PF00024
	contig_223525		15.4363	7.67591	0	13.9201	0	0	CS pos: 19-20 VHS-KS Pr: 05165	Cathepsin L	Daphnia magna	A0A0P6FZJ9	3.29e-144	Papain family cysteine protease	PF00112
	contig_367664		4.12918	2.40853	0	2.22826	0	0	CS pos: 18-19 VHM-GP Pr: 03237	Cathepsin L 2	Bactrocera latifrons	A0A0K8U8N8	5.98e-104	Papain family cysteine protease	PF00112
	contig_327342		76.0281	82.8321	85.6077	87.7425	0	0	CS pos: 16-17 VTA-YK Pr: 09119	Lipase	Folsomia candida	A0A226E1Q5	4.47e-81	Partial alpha/beta-hydrolase lipase region	PF04083
	contig_160771		7.47493	11.9995	93.241	95.1588	0	0	CS pos: 18-19 GLG-EK Pr: 08498	Lipase	Tribolium castaneum	D2A0X6	5.38e-85	Partial alpha/beta-hydrolase lipase region	PF04083
	contig_187587		0	0	6.64875	2.10863	0	0						PB1 domain	PF00564
	contig_178701	RsutOBP1	214.591	149.883	384.904	308.072	0	0		OBP12	Metrius contractus	A0A0V0J0Y9	3.15e-19	PBP/GOBP family	PF01395
	contig_130867		3391.35	3078.69	0	1.82147	0	0		OBP30	Paussus spinicoxis	A0A0V0J101	2.03e-13	PBP/GOBP family	PF01395
	contig_98557	RsutOBP51	687.227	745.274	74.9173	52.2547	0	0		OBP31	Paussus spinicoxis	A0A0V0J121	7.56e-12	PBP/GOBP family	PF01395
	contig_119547	RsutOBP36	947.888	1037.34	233.548	101.579	0	0	CS pos: 17-18 ALA-QN Pr: 09471	OBP4	Paussus spinicoxis	A0A0V0J102	1.49e-17	PBP/GOBP family	PF01395
	contig_119547	RsutOBP35	947.888	1037.34	233.548	101.579	0	0	CS pos: 17-18 ALA-QN Pr: 09471	OBP4	Paussus spinicoxis	A0A0V0J102	1.49e-17	PBP/GOBP family	PF01395
	contig_136812	RsutOBP25	593.566	621.25	1210.71	1166.74	0	1	CS pos: 18-19 VNG-LP Pr: 08099	OBP6	Metrius contractus	A0A0V0J2I1	1.76e-15	PBP/GOBP family	PF01395
	contig_212635	RsutOBP14	296.139	259.58	5647.81	4512.49	0	0		OBP8	Metrius contractus	A0A0V0J1C3	2.13e-11	PBP/GOBP family	PF01395
	contig_110328	RsutOBP43	25.4998	14.4122	290.147	130.595	0	0		Odorant-binding protein 1	Cybister japonicus	A0A1Q1N696	5.03e-12	PBP/GOBP family	PF01395
	contig_110326	RsutOBP42	806.187	1034.77	13051.5	10003.6	0	0		Odorant-binding protein 1	Cybister japonicus	A0A1Q1N696	5.94e-11	PBP/GOBP family	PF01395
	contig_191531	RsutOBP49	3702.06	3810.21	87.2995	118.37	0	0		Odorant-binding protein 6	Monochamus alternatus	A0A1I9HZL2	2.76e-17	PBP/GOBP family	PF01395
	contig_288427	RsutOBP47	7126.36	6984.48	11.7358	30.6457	0	0		Pheromone binding protein 1	Anoplophora glabripennis	A0A1Z2RQG6	1.34e-21	PBP/GOBP family	PF01395
	contig_47768	RsutOBP48	132.265	156.678	0.621672	0.560008	0	0		Uncharacterized protein	Photinus pyralis	A0A1Y1NGY6	1.16e-27	PBP/GOBP family	PF01395
	contig_47765	RsutOBP48	1211.07	1195.89	10.8782	8.77696	0	0	CS pos: 19-20 GIS-DE Pr: 05089	Uncharacterized protein	Photinus pyralis	A0A1Y1NGY6	5.44e-36	PBP/GOBP family	PF01395
	contig_200771	RsutOBP50	11.5594	7.52141	5724.97	6317.48	0	1						PBP/GOBP family	PF01395
	contig_207835	RsutOBP24	29.9588	30.3865	666.108	567.446	0	1	CS pos: 23-24 TLA-NI Pr: 08791					PBP/GOBP family	PF01395
	contig_291563	RsutOBP30	250.713	441.577	500.347	542.862	0	1	CS pos: 25-26 TAA-LP Pr: 07890					PBP/GOBP family	PF01395
	contig_110321	RsutOBP41	2055.92	1431.62	26491.1	12995.7	0	0						PBP/GOBP family	PF01395
	contig_112373	RsutOBP12	90.9713	134.864	838.552	722.506	0	0						PBP/GOBP family	PF01395
	contig_119535	RsutOBP37	1366	1415.97	1725.29	1496.82	0	0	CS pos: 18-19 VTA-QQ Pr: 09053					PBP/GOBP family	PF01395
	contig_119550	RsutOBP37	460.239	554.76	821.387	847.985	0	0						PBP/GOBP family	PF01395
	contig_119556	RsutOBP35	657.819	748.207	2826.72	3281.05	0	0						PBP/GOBP family	PF01395
	contig_140886	RsutOBP8	27.6357	39.0454	511.042	271.135	0	0						PBP/GOBP family	PF01395
	contig_141610	RsutOBP21	461.097	526.088	8425	7928.06	0	0						PBP/GOBP family	PF01395
	contig_147478	RsutOBP13	224.527	317.879	881.721	884.175	0	0	CS pos: 18-19 SLS-LP Pr: 07427					PBP/GOBP family	PF01395
	contig_147481	RsutOBP12	146.455	251.445	1650.64	1481.07	0	0	CS pos: 18-19 SFS-LP Pr: 08361					PBP/GOBP family	PF01395
	contig_147483	RsutOBP12	148.875	206.716	1048.92	1189.37	0	0						PBP/GOBP family	PF01395
	contig_161961	RsutOBP31	13.4898	12.8969	218.957	114.219	0	0	CS pos: 18-19 TSA-QT Pr: 09084					PBP/GOBP family	PF01395
	contig_174841	RsutOBP7	6701.75	7815.38	3465.45	3514.21	0	0						PBP/GOBP family	PF01395
	contig_293029	RsutOBP17	10.5459	23.6954	7107.38	8113.25	0	0	CS pos: 19-20 VMA-DN Pr: 08584					PBP/GOBP family	PF01395
	contig_317483	RsutOBP35	718.053	732.312	3755.08	4404.67	0	0						PBP/GOBP family	PF01395
	contig_317487	RsutOBP37	1412.38	1448.63	2741.64	1832.79	0	0						PBP/GOBP family	PF01395
	contig_334456	RsutOBP19	556.744	525.444	6418.78	7494.86	0	0						PBP/GOBP family	PF01395
	contig_334459	RsutOBP20	4064.35	4105.35	58102.5	54808.9	0	0	CS pos: 19-20 TYG-QL Pr: 09717					PBP/GOBP family	PF01395
	contig_337583	RsutOBP6	8805.83	10241.6	14719	11509.1	0	0						PBP/GOBP family	PF01395
	contig_337586	RsutOBP6	36236.5	45625.1	59412.7	51853.2	0	0	CS pos: 17-18 VCA-NM Pr: 07791					PBP/GOBP family	PF01395
	contig_337587	RsutOBP6	15897.5	20140.8	21028.4	19781.3	0	0						PBP/GOBP family	PF01395
	contig_354441	RsutOBP22	50048.1	64304.2	29757.2	28758.1	0	0						PBP/GOBP family	PF01395
	contig_47761	RsutOBP48	919.713	927.257	6.37265	11.3702	0	0						PBP/GOBP family	PF01395
	contig_239361		14.3034	17.9538	18.2066	22.3928	0	0		Rhophilin-2-like Protein	Tribolium castaneum	A0A139WFV4	9.92e-70	PDZ domain (Also known as DHR or GLGF)	PF00595
	contig_284181		1.03238	0.80189	4.47645	4.15622	0	1		Endothelin-converting enzyme 2-like Protein	Tribolium castaneum	D6X2U0	0.0	Peptidase family M13	PF05649
	contig_97501		1.78995	1.63795	2.988	2.65077	0	0		Uncharacterized protein	Apis mellifera	A0A088AKD7	0.0	Peptidase family M13	PF01431
	contig_346715		345.876	374.214	430.191	368.433	0	0	CS pos: 17-18 THG-FK Pr: 09674	Phospholipase A2	Habropoda laboriosa	A0A0L7R6K6	3.57e-57	Phospholipase A2	PF05826
	contig_40732		72.5771	3.73436	94.2831	1.88898	0	2	CS pos: 41-42 AYA-SP Pr: 07252	Uncharacterized protein	Trichomalopsis sarcophagae	A0A232FDS8	2.23e-11	Predicted membrane protein (DUF2206)	PF09971
	contig_187883		0	0	36.9068	5.6163	0	0						Proliferating cell nuclear antigen, N-terminal domain	PF00705
	contig_232201		125.733	150.394	97.8621	81.7935	0	0		SFRICE_032840	Spodoptera frugiperda	A0A2H1WWL6	1.02e-50	Protein kinase domain	PF00069
	contig_232189		30.4796	25.4905	17.3171	13.2871	0	0		Uncharacterized protein	Photinus pyralis	A0A1Y1LJJ0	4.60e-68	Protein kinase domain	PF00069
	contig_232187		11.4784	18.2618	9.14079	7.72505	0	0		Uncharacterized protein	Photinus pyralis	A0A1Y1LJJ0	5.81e-101	Protein kinase domain	PF00069
	contig_19180		0	0	13.6546	0.0819681	0	0	CS pos: 15-16 SFG-ED Pr: 06509					Protein of unknown function (DUF1007)	PF06226
	contig_187745		0	0	47.9425	30.8101	0	1	CS pos: 25-26 IIA-NY Pr: 04371	Uncharacterized protein	Zootermopsis nevadensis	A0A067QXI5	1.50e-14	Protein of unknown function (DUF1091)	PF06477
	contig_297523		0.564701	0.240503	3240.49	3505.08	0	1		Uncharacterized protein	Tribolium castaneum	D2A694	2.96e-15	Protein of unknown function (DUF1091)	PF06477
	contig_46087		0.365838	1.40031	1316.84	1375.66	0	1		Uncharacterized protein	Tribolium castaneum	D6WVL5	5.30e-26	Protein of unknown function (DUF1091)	PF06477
	contig_358585		0	0	22.0556	14.6646	0	0	CS pos: 20-21 VIS-NY Pr: 07313	Uncharacterized protein	Zootermopsis nevadensis	A0A067QXI5	6.11e-11	Protein of unknown function (DUF1091)	PF06477
	contig_134981		0	0	1104.39	1135.32	0	1	CS pos: 22-23 SSS-NI Pr: 05273					Protein of unknown function (DUF1091)	PF06477
	contig_187843		0.334362	0.212414	138.48	89.1687	0	1	CS pos: 28-29 ASS-AG Pr: 04779					Protein of unknown function (DUF1091)	PF06477
	contig_266969		1.16028	0	1123.58	1319.39	0	0						Protein of unknown function (DUF1091)	PF06477
	contig_305153		0	0	2.89643	13.6516	0	0						Protein of unknown function (DUF1091)	PF06477
	contig_63501		90.7465	87.1057	4229.8	3260.43	0	0						Protein of unknown function (DUF1091)	PF06477
	contig_73789		17.7743	20.5981	68.8451	71.1073	0	0	CS pos: 21-22 SNG-YY Pr: 06346					Protein of unknown function (DUF1091)	PF06477
	contig_79144		8.36966	1.54761	812.048	760.586	0	0						Protein of unknown function (DUF1091)	PF06477
	contig_125104		2.31706	1.7022	0	3.51313	0	0		Uncharacterized protein	Bactrocera latifrons	A0A0K8W0F1	0.0	Protein of unknown function (DUF1192)	PF06698
	contig_64014		0	0	2.0565	0.339924	0	0		Uncharacterized protein	Bactrocera latifrons	A0A0K8W0F1	0.0	Protein of unknown function (DUF1192)	PF06698
	contig_185405		269.202	401.973	127.743	117.82	0	1						Protein of unknown function (DUF1201)	PF06716
	contig_365210		10.4532	8.76416	2.25651	2.00775	0	1	CS pos: 20-21 VFG-QE Pr: 09620	Osiris 12	Anopheles christyi	A0A182JZ29	2.95e-54	Protein of unknown function (DUF1676)	PF07898
	contig_29387		1.29984	2.25175	1.62823	1.40053	0	0		Uncharacterized protein	Schizaphis graminum	A0A2S2NL58	4.61e-56	Protein of unknown function (DUF1759)	PF03564
	contig_158124		18.9337	42.1143	42.6644	30.3589	0	0		Uncharacterized protein	Clastoptera arizonana	A0A1B6C5Q2	1.25e-32	Protein of unknown function (DUF229)	PF02995
	contig_173116		22.8445	23.7994	29.6981	32.0042	0	1	CS pos: 22-23 TLS-QQ Pr: 07699	Uncharacterized protein	Tribolium castaneum	A0A139WGZ3	3.81e-57	Protein of unknown function (DUF2505)	PF10698
	contig_185408		260.739	262.879	178.441	129.73	0	1		Uncharacterized protein	Tribolium castaneum	A0A139WN01	2.29e-17	Protein of unknown function (DUF2615)	PF11027
	contig_316646		3.08519	2.48353	0	5.99664	0	0		Uncharacterized protein	Bactrocera latifrons	A0A0K8VW98	9.08e-26	Protein of unknown function (DUF2816)	PF10992
	contig_261109		2074.32	64.6997	4166.56	35.9	0	0						Protein of unknown function (DUF2852)	PF11014
	contig_19106		24.6024	26.6581	1.77772	1.41321	0	0		UPF0769 protein C21orf59 homolog	Agrilus planipennis	A0A1W4W6W6	6.23e-143	Protein of unknown function (DUF2870)	PF11069
	contig_203711		1249.27	2156.65	608.035	1259.53	0	0						Protein of unknown function (DUF3232)	PF11554
	contig_261325		145.892	200.864	114.244	103.258	0	2						Protein of unknown function (DUF3509)	PF12021
	contig_279423		1261.23	1476.48	665.823	1517.39	0	0						Protein of unknown function (DUF3533)	PF12051
	contig_36933		13.9125	0	4.43967	0	0	0						Protein of unknown function (DUF724)	PF05266
	contig_261326		290.182	410.54	190.19	198.914	0	0	CS pos: 17-18 IQA-SP Pr: 06692					Protein of unknown function (DUF725)	PF05267
	contig_298910		4.98033	5.09345	6.60657	6.36958	0	1		Uncharacterized protein	Photinus pyralis	A0A1Y1LSX8	0.0	Protein tyrosine kinase	PF07714
	contig_95385		13.8618	15.6576	19.6096	16.6325	0	0		Uncharacterized protein	Cryptotermes secundus	A0A2J7R233	4.55e-59	Protein-tyrosine phosphatase	PF00102
	contig_69653		556.601	555.238	1726.32	1378.48	0	0	CS pos: 20-21 VNS-QI Pr: 09872	Serine proteinase stubble	Culex quinquefasciatus	B0X9R1	1.17e-14	PT repeat	PF04886
	contig_153887		4.26146	4.64531	0.990385	1.63696	0	0		TBC1 domain family member 19-like Protein	Tribolium castaneum	D2A1I5	0.0	Rab-GTPase-TBC domain	PF00566
	contig_135926		22.885	22.6484	26.8856	24.0362	0	0		Uncharacterized protein	Tribolium castaneum	D6WLL4	2.22e-71	Radial spoke protein 3	PF06098
	contig_296309		39.0523	44.8337	51.797	46.0788	0	0		Uncharacterized protein	Photinus pyralis	A0A1Y1NE13	4.19e-87	Radial spoke protein 3	PF06098
	contig_27026		85.4972	95.7877	298.402	138.04	0	0						Raf-like Ras-binding domain	PF02196
	contig_259061		15201.8	17869.9	31875.6	0	18.4012	0	CS pos: 21-22 YHS-KD Pr: 03651					RAM signalling pathway protein	PF10428
	contig_122700		14.2027	11.3125	56.348	69.2353	0	0		Uncharacterized protein	Ciona savignyi	H2YW59	7.68e-40	Ras family	PF00071
	contig_88885		70.5547	90.5019	67.1324	66.2639	0	0		Rab-like protein 5	Zootermopsis nevadensis	A0A067R4E3	8.15e-50	Ras of Complex, Roc, domain of DAPkinase	PF08477
	contig_120580		0.237184	0.583775	2.7711	3.06173	0	1		Guanylate cyclase	Tribolium castaneum	A0A139WC82	0.0	Receptor family ligand binding region	PF01094
	contig_244671		18.8218	6.52892	9.34462	3.45682	0	0		Uncharacterized protein	Trachymyrmex septentrionalis	A0A151JV77	7.33e-68	Recombination endonuclease VII	PF02945
	contig_173208		3.92096	7.87711	7.10758	9.12738	0	0		Uncharacterized protein	Zootermopsis nevadensis	A0A067RAZ3	5.63e-76	Replication protein A OB domain	PF16900
	contig_308430		5.39956	4.25261	5.3595	3.24018	0	0		Putative RNA-directed DNA polymerase from transposon X-element-like Protein	Tribolium castaneum	D7GY19	3.59e-130	Reverse transcriptase (RNA-dependent DNA polymerase)	PF00078
	contig_336267		8.3555	7.35792	8.29444	6.15479	0	0		RNA-directed DNA polymerase from mobile element jockey-like Protein	Tribolium castaneum	D6WFI4	1.19e-71	Reverse transcriptase (RNA-dependent DNA polymerase)	PF00078
	contig_317563		2.58027	2.23752	2.73767	1.59616	0	0		Uncharacterized protein	Photinus pyralis	A0A1Y1NA23	0.0	Reverse transcriptase (RNA-dependent DNA polymerase)	PF00078
	contig_74251		0	15.9569	0.490056	20.3573	0	0		Uncharacterized protein	Photinus pyralis	A0A1Y1M9R5	6.67e-40	Reverse transcriptase (RNA-dependent DNA polymerase)	PF00078
	contig_229642		24.6799	35.6424	19.3431	31.5073	0	0		Gag-pol polyprotein	Lasius niger	A0A0J7KDE2	4.15e-43	Reverse transcriptase-like	PF13456
	contig_262215		2.44283	3.97317	0.593383	1.69706	0	0		RIB43A-like with coiled-coils protein 1	Blattella germanica	A0A2P8XLX1	1.92e-121	RIB43A	PF05914
	contig_306073		478.234	427.035	750.424	769.438	0	0		Uncharacterized protein	Oryctes borbonicus	A0A0T6B818	2.76e-31	Ricin-type beta-trefoil lectin domain	PF00652
	contig_184406		8.28727	10.6102	11.4942	10.4064	0	0		Nucleolysin TIA-1 isoform p40-like Protein	Tribolium castaneum	A0A139WP22	8.65e-150	RNA recognition motif. (a.k.a. RRM, RBD, or RNP domain)	PF00076
	contig_38869		10.9294	9.42988	14.7165	11.8221	0	0		Uncharacterized protein	Photinus pyralis	A0A1Y1KU68	2.11e-130	RNA recognition motif. (a.k.a. RRM, RBD, or RNP domain)	PF00076
	contig_77372		5.33565	4.82047	5.78805	4.09785	0	0		Uncharacterized protein	Aedes albopictus	A0A182GH56	5.49e-34	RNA recognition motif. (a.k.a. RRM, RBD, or RNP domain)	PF00076
	contig_171859		36.2838	32.083	13.8495	20.441	0	0						SCIMP protein	PF15050
	contig_341025		5968.07	7419.05	95640.6	118531	0	0						Scorpion short toxin, BmKK2	PF00451
	contig_51131		37.3401	70.0328	96.1752	116.463	0	0						Serine acetyltransferase, N-terminal	PF06426
	contig_103885		415.144	358.6	1166.39	899.866	0	0		Putative serine protease K12H4.7	Papilio xuthus	A0A194PQR5	1.25e-27	Serine carboxypeptidase S28	PF05577
	contig_103872		177.324	197.139	483.966	583.753	0	0						Serine carboxypeptidase S28	PF05577
	contig_151667		0	0	1137.7	1664.68	0	0						Shadow of prion protein, neuroprotective	PF14999
	contig_111449		28.9874	23.5858	92.8602	64.4043	0	0		15-hydroxyprostaglandin dehydrogenase [NAD(+)]	Lingula unguis	A0A1S3IUI5	4.49e-15	short chain dehydrogenase	PF00106
	contig_102214		40.1419	38.3943	72.2948	82.3738	0	0		15-hydroxyprostaglandin dehydrogenase [NAD+]	Blattella germanica	A0A140KPR8	3.49e-62	short chain dehydrogenase	PF00106
	contig_335408		47.7138	62.5917	86.9134	72.7185	0	2		Dehydrogenase	Oryctes borbonicus	A0A0T6B086	1.19e-66	short chain dehydrogenase	PF00106
	contig_281511		21.125	31.7818	4.38395	1.31366	0	0		Dehydrogenase/reductase SDR family member 11	Zootermopsis nevadensis	A0A067QVP7	2.76e-29	short chain dehydrogenase	PF00106
	contig_346543		1829.02	2389.62	1837.54	1690.81	0	0		Dehydrogenase/reductase SDR family member 11	Zootermopsis nevadensis	A0A067QVP7	3.33e-23	short chain dehydrogenase	PF00106
	contig_275113		244.036	322.721	667.312	681.855	0	0		Dehydrogenase/reductase SDR family member 11	Blattella germanica	A0A2P8XJR8	5.23e-31	short chain dehydrogenase	PF00106
	contig_281499		48.5412	52.0599	4.50081	5.25181	0	0		farnesol dehydrogenase-like	Agrilus planipennis	A0A1W4WZ38	1.04e-74	short chain dehydrogenase	PF00106
	contig_346530		631.182	722.629	772.848	693.816	0	0		farnesol dehydrogenase-like	Agrilus planipennis	A0A1W4WN42	3.02e-18	short chain dehydrogenase	PF00106
	contig_235599		0	0	3.17114	6.28235	0	1		Uncharacterized protein	Photinus pyralis	A0A1Y1N8N2	3.94e-85	short chain dehydrogenase	PF00106
	contig_33141		4.85941	6.23451	9.89194	7.45654	0	0		Uncharacterized protein	Photinus pyralis	A0A1Y1LK58	1.20e-102	short chain dehydrogenase	PF00106
	contig_275114		312.638	414.497	825.109	752.194	0	0		Uncharacterized protein	Musca domestica	A0A1I8MBG2	3.00e-16	short chain dehydrogenase	PF00106
	contig_62298		6.36223	10.4337	7.49572	7.51813	0	0		Uncharacterized protein	Tribolium castaneum	D7ELE5	3.48e-74	short chain dehydrogenase	PF00106
	contig_216873		30.1253	28.6493	846.029	646.525	0	0		Uncharacterized protein	Tribolium castaneum	D7ELE5	4.37e-77	short chain dehydrogenase	PF00106
	contig_319907		53.8818	67.2569	132.821	97.2309	0	0		Uncharacterized protein	Glossina pallidipes	A0A1A9Z224	5.35e-16	short chain dehydrogenase	PF00106
	contig_275110		467.088	451.518	1134.33	982.611	0	0		Uncharacterized protein	Apis mellifera	H9K5X4	7.48e-24	short chain dehydrogenase	PF00106
	contig_60810		395.397	374.274	735.128	670.986	0	0		Uncharacterized protein	Graphocephala atropunctata	A0A1B6M980	7.65e-15	short chain dehydrogenase	PF00106
	contig_111444		79.7735	75.7082	219.313	155.708	0	0		Zgc:56585	Astyanax mexicanus	W5JZW2	9.34e-46	short chain dehydrogenase	PF00106
	contig_333665		12.166	10.1867	28.0635	18.6727	0	4		Uncharacterized protein	Oryctes borbonicus	A0A0T6BDL5	9.95e-89	Sid-5 family	PF17204
	contig_280509		173.545	203.286	128.983	100.226	0	1		Solute carrier family 46 member 3	Lygus hesperus	A0A0A9W1R3	4.01e-25	Sigma factor regulator N-terminal	PF13800
	contig_354740		10.249	73.3084	6.37625	89.2598	0	0						Sigma-70, non-essential region	PF04546
	contig_259073		55044.1	70885.1	77691.7	100720	67.6907	0						SMP-30/Gluconolaconase/LRE-like region	PF08450
	contig_355635		10.0994	11.6108	1.66323	2.19806	0	0		Protein MAATS1-like Protein	Tribolium castaneum	D7EKM5	0.0	Solute carrier (proton/amino acid symporter), TRAMD3 or PAT1	PF14738
	contig_38705		14.2948	15.0415	8.68523	8.6482	0	0		Uncharacterized protein	Cryptotermes secundus	A0A2J7RPE2	1.94e-104	SPRY domain	PF00622
	contig_37493		45.3747	35.6308	95.6733	115.954	0	0						STAS domain	PF01740
	contig_281269		4.57065	4.69147	14.9918	12.2837	0	12		Facilitated trehalose transporter Tret1-2 homolog-like Protein	Tribolium castaneum	D6WET6	5.12e-82	Sugar (and other) transporter	PF00083
	contig_218335		3.20882	1.74337	8.7536	4.65007	0	12		facilitated trehalose transporter Tret1-like	Agrilus planipennis	A0A1W4XAC6	4.56e-118	Sugar (and other) transporter	PF00083
	contig_123629		62.2118	65.8821	256.485	237.446	0	5		Uncharacterized protein	Photinus pyralis	A0A1Y1N388	4.33e-41	Sugar (and other) transporter	PF00083
	contig_123632		81.1757	99.7569	344.836	244.323	0	2						Sugar (and other) transporter	PF00083
	contig_197120		106.086	121.574	241.879	254.469	0	1		Putative sulfate/bicarbonate/oxalate exchanger sat-1	Aedes albopictus	A0A023EVF2	1.79e-34	Sulfate permease family	PF00916
	contig_296230		1.46372	0.719458	2.8709	3.00199	0	8		Sodium-independent sulfate anion transporter-like Protein	Tribolium castaneum	D6WUN9	0.0	Sulfate permease family	PF00916
	contig_199715		18.729	12.4347	17.1169	15.0713	0	0		Uncharacterized protein	Oryctes borbonicus	A0A0T6BGS6	2.22e-33	Sulfate permease family	PF00916
	contig_32599		12.0777	10.3825	58.192	75.6002	0	1		Amine sulfotransferase	Cryptotermes secundus	A0A2J7PYK9	3.06e-32	Sulfotransferase domain	PF00685
	contig_32601		9.6938	5.83133	26.4616	34.4372	0	0		Estrogen sulfotransferase	Cryptotermes secundus	A0A2J7PYP0	1.68e-51	Sulfotransferase domain	PF00685
	contig_336040		119.601	149.597	331.276	382.01	0	0		Uncharacterized protein	Oryctes borbonicus	A0A0T6B0K9	4.80e-42	Sulfotransferase domain	PF00685
	contig_70933		22.408	15.4987	42.2125	21.4369	0	0		Pipe	Blattella germanica	A0A1L7RU15	3.23e-172	Sulfotransferase family	PF03567
	contig_56538		25.7025	42.5126	6.93048	19.9484	0	0						Sulfurtransferase TusA	PF01206
	contig_174049		2.51086	2.41122	1.60285	1.55336	0	0		Optomotor-blind protein-like Protein	Tribolium castaneum	A0A139WFZ8	0.0	T-box	PF00907
	contig_224462		3.53523	4.49896	1.32322	1.42934	0	0		Uncharacterized protein	Photinus pyralis	A0A1Y1N046	0.0	Tektin family	PF03148
	contig_349606		10.1652	11.147	10.594	10.4136	0	4		Tetraspanin	Tribolium castaneum	D6W8H3	4.63e-120	Tetraspanin family	PF00335
	contig_124778		4.77708	5.3847	0.37019	0.493341	0	0		Sperm-associated antigen 1-like Protein	Tribolium castaneum	D6WNX4	1.59e-72	Tetratricopeptide repeat	PF00515
	contig_195972		8.83358	9.47537	8.41575	7.3244	0	0		Tetratricopeptide repeat protein 8-like Protein	Tribolium castaneum	D6X349	0.0	Tetratricopeptide repeat	PF07719
	contig_372714		9.62519	0.896105	0	1.46222	0	0	CS pos: 16-17 SFG-ED Pr: 07863					Tetratricopeptide repeat	PF14559
	contig_70742		151.807	199.774	116.697	101.875	0	0		ADP-ribosylation factor-like protein 2-binding protein	Zootermopsis nevadensis	A0A067R0L5	5.44e-44	The ARF-like 2 binding protein BART	PF11527
	contig_302078		377.219	493.2	314.577	306.036	0	0		Uncharacterized protein	Photinus pyralis	A0A1Y1L501	4.44e-38	The ARF-like 2 binding protein BART	PF11527
	contig_91532		0	0	32.6294	11.8711	0	0		Thioredoxin	Schistosoma japonicum	Q27HR7	7.98e-19	Thioredoxin	PF00085
	contig_218920		4.37167	2.5824	7.44973	6.7555	0	0	CS pos: 17-18 LGC-DL Pr: 03485	Uncharacterized protein	Tribolium castaneum	A0A139WKY4	1.22e-85	Thrombospondin type 1 domain	PF00090
	contig_247229		0	0	10.6715	0.292494	0	2	CS pos: 28-29 ALS-QA Pr: 03749					TMEM154 protein family	PF15102
	contig_322982		21.856	36.2015	41.5961	35.9689	0	1		Uncharacterized protein	Dendroctonus ponderosae	N6TN29	9.78e-34	TMIE protein	PF16038
	contig_179596		0.425951	0	35.6114	12.5574	0	1	CS pos: 30-31 SFA-EE Pr: 07923	Putative cuticle protein CPH42	Bombyx mori	D0VEQ3	8.79e-19	TonB N-terminal region	PF16031
	contig_179591		0	0	62.8695	35.1214	0	0	CS pos: 18-19 SHA-EE Pr: 09578	Uncharacterized protein	Triatoma infestans	A0A161M957	1.94e-18	TonB N-terminal region	PF16031
	contig_313600		11.0559	14.7507	16.2012	28.0083	0	0		TNF receptor-associated factor 4 isoform X1	Agrilus planipennis	A0A1W4XIH4	5.84e-60	TRAF-type zinc finger	PF02176
	contig_39065		4.98974	3.74684	3.87453	5.16754	0	0		Uncharacterized protein	Photinus pyralis	A0A1Y1KEI7	5.23e-93	Transferrin	PF00405
	contig_185684		3.15002	3.81637	3.96595	3.51889	0	0		Bone morphogenetic protein 3	Zootermopsis nevadensis	A0A067RDY8	6.91e-60	Transforming growth factor beta like domain	PF00019
	contig_286466		10.8678	13.1916	11.2376	15.8211	0	1		Uncharacterized protein	Blattella germanica	A0A2P8YCM3	7.30e-62	Transglycosylase associated protein	PF04226
	contig_203283		98.0775	85.7418	123.633	108.281	0	1		Ig-like and fibronectin type-III domain-containing protein C25G4.10	Zootermopsis nevadensis	A0A067R523	7.24e-35	Transmembrane alpha-helix domain	PF08693
	contig_187977		7.19505	33.2811	3.56797	37.0367	0	0						Transmembrane domain of transglycosylase PBP1 at N-terminal	PF14812
	contig_152632		103.384	120.855	179.158	145.036	0	2						Transmembrane protein family 72	PF16054
	contig_249502		40.4345	56.1678	25.2284	32.7721	0	0		Uncharacterized protein	Photinus pyralis	A0A1Y1MUJ7	3.14e-26	Trichohyalin-plectin-homology domain	PF13868
	contig_373650		13.8202	9.90208	48.6264	40.2623	0	0	CS pos: 17-18 VTS-FT Pr: 06598	Ejaculate serine protease	Allonemobius socius	E5KHE3	9.90e-99	Trypsin	PF00089
	contig_104723		0	0	829.773	621.233	0	0		Proclotting enzyme	Apis cerana cerana	A0A2A3ENM0	7.88e-24	Trypsin	PF00089
	contig_84629		195.318	237.73	923.366	831.755	0	0		Putative clip-domain serine protease subfamily protein a	Anopheles darlingi	A0A2M4CQH1	9.56e-62	Trypsin	PF00089
	contig_233400		48.9157	40.4605	1006.41	846.242	0	0		Putative serine protease 40	Reticulitermes speratus	A0A1V1FIT2	1.77e-33	Trypsin	PF00089
	contig_364652		0.0837844	0	97.3567	74.4056	0	0		Serine protease easter	Lasius niger	A0A0J7L2R7	9.38e-118	Trypsin	PF00089
	contig_104705		0	0	829.007	620.217	0	1		Serine protease P55	Tribolium castaneum	D6W808	9.57e-44	Trypsin	PF00089
	contig_84627		113.772	179.043	661.119	532.764	0	0		Serine proteinase stubble	Culex quinquefasciatus	B0X9R1	5.30e-27	Trypsin	PF00089
	contig_233393		41.603	55.4575	1431.21	1110.27	0	0		Trypsin-like serine protease	Amblyomma variegatum	F0J9E7	6.21e-35	Trypsin	PF00089
	contig_328980		8.42079	10.6492	0.213619	0.284833	0	0		Uncharacterized protein	Trichomalopsis sarcophagae	A0A232FGI5	2.36e-27	Trypsin	PF00089
	contig_197032		24.3339	27.4996	383.783	326.516	0	0		Uncharacterized protein	Trichomalopsis sarcophagae	A0A232EW13	2.73e-13	Trypsin	PF00089
	contig_69656		708.313	637.252	775.453	536.481	0	0		Uncharacterized protein	Lutzomyia longipalpis	A0A1B0CMQ8	3.34e-91	Trypsin	PF00089
	contig_284376		45.335	49.9467	1195.99	922.98	0	0		Uncharacterized protein	Blattella germanica	A0A2P8Z2I7	4.90e-20	Trypsin	PF00089
	contig_160125		14.9893	14.9503	30.5968	34.0509	0	0		Uncharacterized protein	Nasonia vitripennis	K7J1V4	5.71e-24	Trypsin	PF00089
	contig_197039		20.5396	30.1681	413.458	336.797	0	0		Uncharacterized protein	Nasonia vitripennis	K7IUZ9	5.77e-27	Trypsin	PF00089
	contig_168219		65.0495	72.5502	66.3956	45.2515	0	0		Uncharacterized protein	Drosophila virilis	B4LZF2	6.80e-27	Trypsin	PF00089
	contig_224081		234.953	321.906	969.633	1225.97	0	0		Uncharacterized protein	Nasonia vitripennis	K7J1V4	7.82e-49	Trypsin	PF00089
	contig_203129		1.11122	0	752.669	593.352	0	1		Venom serine protease Bi-VSP	Cryptotermes secundus	A0A2J7R073	7.78e-31	Trypsin	PF00089
	contig_233390		13.1073	9.93209	276.578	210.447	0	0						Trypsin	PF00089
	contig_140191		191.756	268.619	169.999	166.602	0	0		Putative Tubulin alpha-1 chain	Daphnia magna	A0A0P5N6S2	2.47e-50	Tubulin C-terminal domain	PF03953
	contig_140194		173.589	169.543	143.59	132.137	0	0		Tubulin alpha-1C chain	Larimichthys crocea	A0A0F8ACQ8	1.98e-43	Tubulin C-terminal domain	PF03953
	contig_80787		3.27772	3.68938	2.75831	3.47386	0	0		Putative tubulin polyglutamylase TTLL2-like Protein	Tribolium castaneum	D6WN40	0.0	Tubulin-tyrosine ligase family	PF03133
	contig_360816		14.6005	26.2476	20.6528	18.1437	0	0		Uncharacterized protein	Dendroctonus ponderosae	N6TVJ1	3.21e-56	Tubulin-tyrosine ligase family	PF03133
	contig_317564		5.80009	4.29758	4.63552	4.12111	0	0						Tubulin-tyrosine ligase family	PF03133
	contig_125073		1.8195	3.37024	0	4.50372	0	0		Uncharacterized protein	Bactrocera latifrons	A0A0K8W0F1	8.15e-153	Tup N-terminal	PF08581
	contig_305244		0	0	32.7789	20.2075	0	0		Uncharacterized protein	Oikopleura dioica	E4Y3C3	8.13e-93	Ubiquitin family	PF00240
	contig_285748		0	0	9.68221	8.92314	0	0						Ubiquitin-like modifier-activating enzyme ATG7 N-terminus	PF16420
	contig_81795		2.64262	1.96876	2.31411	3.00474	0	1		UDP-glucuronosyltransferase	Pediculus humanus subsp. corporis	E0VMM1	2.05e-75	UDP-glucoronosyl and UDP-glucosyl transferase	PF00201
	contig_47820		16.0162	13.7938	50.1368	41.5332	0	0		UDP-glucuronosyltransferase	Photinus pyralis	A0A1Y1N2G3	2.21e-99	UDP-glucoronosyl and UDP-glucosyl transferase	PF00201
	contig_114450		26.6015	44.3365	58.0201	105.715	0	0	CS pos: 24-25 VES-AR Pr: 09015	UDP-glucuronosyltransferase	Agrilus planipennis	A0A1W4XHV4	2.35e-106	UDP-glucoronosyl and UDP-glucosyl transferase	PF00201
	contig_48352		2.73889	7.85644	0	0	0	0						UME (NUC010) domain	PF08064
	contig_9775		150.777	296.496	477.765	320.064	0	0		CG30108	Drosophila busckii	A0A0M4EAB1	6.12e-25	Uncharacterised protein family (UPF0203)	PF05254
	contig_230106		323.237	464.489	11.3896	18.5121	0	0						UPF0731 family	PF14982
	contig_146173		88.5607	54.2078	26.0272	16.1421	0	0		DNA Pol B2 domain-containing protein	Glyptapanteles flavicoxis	B7S8N9	6.93e-27	Vps54-like protein	PF07928
	contig_101782		3.13181	3.58274	0.332814	0.509566	0	0		Dynein intermediate chain 2, ciliary-like Protein	Tribolium castaneum	D6WSR8	0.0	WD domain, G-beta repeat	PF00400
	contig_368912		10.5301	7.71852	0.293966	0.782971	0	0		Guanine nucleotide-binding protein subunit beta-2-like Protein	Tribolium castaneum	D6WLT9	0.0	WD domain, G-beta repeat	PF00400
	contig_28227		91.0585	97.9181	141.342	125.406	0	0		Uncharacterized protein	Dendroctonus ponderosae	U4UTP0	5.57e-53	WD domain, G-beta repeat	PF00400
	contig_256792		49.3282	55.5239	0.414835	1.47672	0	0		WD40 domain-containing protein	Oryctes borbonicus	A0A0T6AWD7	3.26e-98	WD domain, G-beta repeat	PF00400
	contig_26417		8.10925	6.70292	10.8788	17.8079	0	0						WH2 motif	PF02205
	contig_266124		3.65713	2.22093	1.62997	1.87995	0	0		Protein Wnt	Aedes aegypti	A0A1S4EWA7	0.0	wnt family	PF00110
	contig_278237		11.6092	9.67672	19.3991	13.8938	0	0	CS pos: 35-36 SDA-AR Pr: 06790	Protein Wnt	Tribolium castaneum	D6WRU0	0.0	wnt family	PF00110
	contig_136032		4.53518	4.72576	3.24965	3.73759	0	0	CS pos: 23-24 VVC-GV Pr: 02637	Protein Wnt	Photinus pyralis	A0A1Y1MRN2	0.0	wnt family	PF00110
	contig_329564		2.45577	2.87537	0	0.0343181	0	0		protein hunchback	Agrilus planipennis	A0A1W4XM94	0.0	Zinc finger, C2H2 type	PF00096
	contig_173945		0.689591	0.983072	5.56537	3.86696	0	0		Senseless	Tribolium castaneum	D6WLB4	8.41e-108	Zinc finger, C2H2 type	PF00096
	contig_120673		1.96983	2.11104	3.56938	1.9727	0	0		Uncharacterized protein	Photinus pyralis	A0A1Y1LBW1	0.0	Zinc finger, C2H2 type	PF00096
	contig_289401		8.84146	5.70448	2.52537	2.0218	0	0		Protein tailless-like Protein	Tribolium castaneum	D6WNH4	8.39e-80	Zinc finger, C4 type (two domains)	PF00105
	contig_190931		1.96971	2.2908	5.30825	1.53589	0	0		Uncharacterized protein	Heliothis virescens	A0A2A4JY07	2.11e-56	Zinc knuckle	PF00098
	contig_260916		0.508937	0.630506	7.6833	6.88793	0	0		Putative zinc-binding oxidoreductase	Anopheles marajoara	A0A2M4BPL9	6.05e-91	Zinc-binding dehydrogenase	PF00107
	contig_207992		3.04653	2.07417	20.5548	27.025	0	0		Uncharacterized protein	Trachymyrmex septentrionalis	A0A151K0A2	7.78e-16	zinc-binding in reverse transcriptase	PF13966
	contig_32870		7.31054	9.79066	3.46146	6.83375	0	0		Uncharacterized protein	Lottia gigantea	V4A5U0	1.30e-42	Zinc-finger double domain	PF13465
	contig_99934		1.94739	2.69981	1.01356	0.753595	0	1	CS pos: 29-30 SQA-LF Pr: 04046	Uncharacterized protein	Photinus pyralis	A0A1Y1LF40	0.0	Zona pellucida-like domain	PF00100
	contig_100024		30.9125	25.2069	20.9518	15.7415	0	0		Bardet-Biedl syndrome 1 protein-like Protein	Tribolium castaneum	D6WZ82	2.59e-18
	contig_350984		65.5339	60.3125	313.16	277.717	0	1		Beta-galactosidase	Anoplophora glabripennis	V5GH47	3.28e-23
	contig_358789		84.6166	77.4537	242.573	247.356	0	0		Beta-galactosidase	Agrilus planipennis	A0A1W4WLM3	2.10e-40
	contig_47520		58.8679	57.2144	80.4114	64.0162	0	2		Fatty acid 2-hydroxylase	Anoplophora glabripennis	V5GTH3	4.26e-54
	contig_377659		20.4217	21.1752	206.722	166.423	0	0	CS pos: 21-22 AGA-EE Pr: 05617	Helicase SRCAP	Cyphomyrmex costatus	A0A195C9P0	1.75e-27
	contig_70656		40.7659	56.3252	45.2702	46.6866	0	0		Intraflagellar transport protein 52 homolog-like Protein	Tribolium castaneum	D6WS70	6.98e-71
	contig_363740		49.4563	75.9189	41.5873	45.3712	0	0		Intraflagellar transport protein 80 homolog-like Protein	Tribolium castaneum	D6WLD8	8.67e-28
	contig_238944		187.818	161.423	102.499	91.9101	0	1		Ionotropic receptor 13	Holotrichia parallela	A0A2P9JY95	8.25e-37
	contig_15043		14.9942	13.0511	0.0777071	0.069001	0	1		Ionotropic receptor 5	Holotrichia parallela	A0A2P9JY88	1.97e-89
	contig_26704		21.3329	23.6525	0	0	0	2		Ionotropic receptor 573	Blattella germanica	A0A2P8YCF0	1.89e-21
	contig_201221		40.4638	47.4205	29.2958	24.3927	0	0		Ionotropic receptor 75q.2b	Cnaphalocrocis medinalis	A0A0U2SQR6	4.38e-30
	contig_274345		51.7734	54.5339	40.5409	48.1242	0	0		Kinesin-like protein	Oryctes borbonicus	A0A0T6B4A0	1.62e-63
	contig_295886		14.8568	17.7553	152.229	93.5198	0	0		Nose resistant to fluoxetine protein 6-like Protein	Tribolium castaneum	D6WQE4	1.76e-13
	contig_178690		1268.27	1616.02	2396.24	1882.42	56.2611	0	CS pos: 18-19 AAG-YD Pr: 07245	OBP12	Metrius contractus	A0A0V0J0Y9	7.24e-17
	contig_88401		20.4192	31.9823	37.6466	22.2131	0	0		PDZ domain-containing protein	Oryctes borbonicus	A0A0T6BCV9	2.60e-52
	contig_63657		1.02897	0.933804	3.72951	2.24882	0	0		POU domain protein	Tribolium castaneum	A0A139WIU6	8.26e-85
	contig_127627		312.768	391.522	179.78	221.699	0	0		prostatic acid phosphatase-like	Agrilus planipennis	A0A1W4WI36	3.67e-13
	contig_332824		24.4769	25.0206	16.0907	15.6026	0	0		Putative aryl hydrocarbon receptor Ss	Leptinotarsa decemlineata	A0A0K0PQJ7	2.53e-89
	contig_17262		0.492533	0.496753	1.48342	1.47269	0	11		Putative transporter	Corethrella appendiculata	U5EED9	0.0
	contig_124649		16.0924	17.1265	4.00222	4.69919	0	1	CS pos: 23-24 ASG-TY Pr: 04585	Serpin peptidase inhibitor 6	Tribolium castaneum	D7EK08	1.29e-51
	contig_14857		10.6304	2.66684	10.1461	2.88352	0	0		SFRICE_035015	Spodoptera frugiperda	A0A2H1WXD0	0.0
	contig_160699		2.86815	1.41361	1.44329	1.47015	0	0		SH3 domain-containing protein	Oryctes borbonicus	A0A0T6BB59	1.27e-65
	contig_294486		5.56405	4.83703	9.98726	11.9591	0	0		Translation initiation factor IF-2	Atta colombica	A0A195BWF1	7.17e-20
	contig_10820		52.1171	0.208051	68.7119	0	0	2		Uncharacterized protein	Papilio machaon	A0A0N1IEA2	8.35e-27
	contig_322830		18.5094	18.7348	21.983	21.9304	0	1		Uncharacterized protein	Tribolium castaneum	D6WL82	1.10e-14
	contig_147964		34.6951	47.7289	62.7303	54.3002	0	1		Uncharacterized protein	Photinus pyralis	A0A1Y1MH93	2.33e-21
	contig_70947		47.4726	24.3883	104.956	51.3914	0	1		Uncharacterized protein	Photinus pyralis	A0A1Y1M8Q4	4.05e-27
	contig_300155		2.95735	3.38424	6.76688	6.00353	0	1		Uncharacterized protein	Tribolium castaneum	A0A139WEL8	6.00e-104
	contig_284330		155.063	212.107	258.35	449.108	0	1		Uncharacterized protein	Dendroctonus ponderosae	U4U1D8	6.79e-15
	contig_192289		49.7568	52.3178	33.5668	37.2463	0	1		Uncharacterized protein	Tribolium castaneum	D6WC62	7.48e-18
	contig_323373		53.1895	76.8899	46.6236	72.818	0	0		Uncharacterized protein	Acyrthosiphon pisum	X1WRB0	1.13e-16
	contig_378941		34.918	37.038	6.41603	5.45699	0	0		Uncharacterized protein	Rhodnius prolixus	T1HTV7	1.15e-31
	contig_192183		6.45919	5.17098	3.97968	4.46212	0	0	CS pos: 18-19 TTG-YP Pr: 07602	Uncharacterized protein	Photinus pyralis	A0A1Y1KJX0	1.15e-59
	contig_328447		0.967639	3.57332	0.0495864	0.0439855	0	0		Uncharacterized protein	Haematobia irritans	A0A1L8EJ06	1.19e-127
	contig_360692		15.956	18.7218	16.7661	19.3426	0	0		Uncharacterized protein	Tribolium castaneum	A0A139WC43	1.24e-66
	contig_250317		17.5274	9.74939	17.3378	10.4076	0	0		Uncharacterized protein	Tribolium castaneum	A0A139WEU2	1.56e-19
	contig_155095		9.90344	7.86448	25.5869	15.1607	0	0		Uncharacterized protein	Oryctes borbonicus	A0A0T6B8K3	1.58e-13
	contig_9062		9.49374	10.4704	55.0063	37.168	0	0		Uncharacterized protein	Cryptotermes secundus	A0A2J7RRQ7	1.68e-34
	contig_13486		38.8611	2.92284	80.9463	20.2089	0	0		Uncharacterized protein	Bactrocera latifrons	A0A0K8WEQ5	1.71e-20
	contig_56359		16.6294	19.2767	1.37933	1.35347	0	0		Uncharacterized protein	Tribolium castaneum	A0A139WMI6	1.91e-12
	contig_298445		0.740035	0.494957	2.41171	1.13014	0	0		Uncharacterized protein	Tribolium castaneum	D2A5G8	2.00e-11
	contig_84026		18.413	22.2356	0.865689	1.80705	0	0		Uncharacterized protein	Dendroctonus ponderosae	J3JT88	2.02e-51
	contig_302076		225.938	196.178	144.518	159.355	0	0		Uncharacterized protein	Tribolium castaneum	D6WPI6	2.12e-19
	contig_250328		14.2671	12.9177	11.1748	15.1878	0	0		Uncharacterized protein	Tribolium castaneum	A0A139WEU2	2.29e-31
	contig_282103		10.4783	15.8056	12.7599	11.1398	0	0		Uncharacterized protein	Photinus pyralis	A0A1Y1JU69	2.56e-33
	contig_303474		5.78085	7.37132	9.6836	7.80291	0	0		Uncharacterized protein	Photinus pyralis	A0A1Y1K248	2.97e-19
	contig_377674		0.644898	1.26197	18.2585	10.7593	0	0	CS pos: 16-17 VSA-AD Pr: 04777	Uncharacterized protein	Blattella germanica	A0A2P8ZAC4	2.98e-32
	contig_160769		12.2856	13.2514	103.617	105.17	0	0		Uncharacterized protein	Anopheles culicifacies	A0A182MVJ6	3.06e-35
	contig_249492		30.6741	38.3333	10.797	22.2657	0	0		Uncharacterized protein	Photinus pyralis	A0A1Y1MUJ7	3.33e-80
	contig_344283		0	0	0	69.9086	0	0		Uncharacterized protein	Daphnia magna	A0A0P5Y7A5	3.67e-47
	contig_289866		31.1877	11.8391	72.4472	2.45613	0	0		Uncharacterized protein	Dendroctonus ponderosae	U4U048	4.10e-23
	contig_373491		875.116	839.307	1226.02	999.27	0	0		Uncharacterized protein	Tribolium castaneum	D6WFK7	4.19e-15
	contig_128767		5.01028	5.39413	3.66662	5.06713	0	0		Uncharacterized protein	Trichomalopsis sarcophagae	A0A232EXK7	4.41e-117
	contig_41860		11.1127	19.3202	1.86493	5.00848	0	0		Uncharacterized protein	Tribolium castaneum	D6WIG7	4.44e-16
	contig_289621		5333.68	5587.81	17514.8	17284.6	0	0		Uncharacterized protein	Dendroctonus ponderosae	J3JZC7	4.58e-14
	contig_56544		4.3049	4.38869	3.54129	3.3352	0	0		Uncharacterized protein	Tribolium castaneum	A0A139WDS1	4.99e-38
	contig_259133		328.36	407.731	928.861	848.26	0	0		Uncharacterized protein	Apis mellifera	A0A087ZU00	5.33e-21
	contig_303204		26.0304	27.395	2.34726	3.90019	0	0		Uncharacterized protein	Photinus pyralis	A0A1Y1KU80	5.39e-47
	contig_114696		0.347978	0	20.1867	15.8341	0	0		Uncharacterized protein	Cryptotermes secundus	A0A2J7QKI8	5.90e-29
	contig_217329		1.85905	2.0818	0.555014	0.579605	0	0		Uncharacterized protein	Anopheles culicifacies	A0A182MH09	6.84e-47
	contig_378939		17.0114	14.7032	1.50862	1.34506	0	0		Uncharacterized protein	Tribolium castaneum	A0A139WMV4	6.87e-37
	contig_114847		40.7131	53.9003	152.109	98.6977	0	0		Uncharacterized protein	Anopheles minimus	A0A182VVE3	7.48e-14
	contig_343534		691.376	970.6	46831.1	43906.3	0	0		Uncharacterized protein	Tribolium castaneum	D2A0Z0	9.81e-12
	contig_303198		3.70611	2.49472	0.460787	0.0240237	0	0		Uncharacterized protein	Rhodnius prolixus	T1I8Y7	9.86e-87
	contig_246841		72.1938	61.7414	61.6494	50.23	0	0		Uncharacterized protein	Clastoptera arizonana	A0A1B6E195	1.76e-23
	contig_229635		6.30578	10.8053	5.48608	9.31609	0	0		Uncharacterized protein	Photinus pyralis	A0A1Y1MYP5	1.85e-44
	contig_283675		185.598	186.898	134.872	114.753	0	0		Uncharacterized protein	Zootermopsis nevadensis	A0A067RCM0	2.47e-20
	contig_26997		30.0568	48.7842	99.7932	56.0611	0	0		Uncharacterized protein	Zootermopsis nevadensis	A0A067QQ93	2.54e-17
	contig_363742		14.355	20.4751	16.5312	21.4257	0	0		Uncharacterized protein	Photinus pyralis	A0A1Y1KVI3	2.58e-50
	contig_260468		0.676484	1.28995	44.4344	50.9318	0	0	CS pos: 22-23 SFA-EE Pr: 09089	Uncharacterized protein	Triatoma infestans	A0A161M957	3.14e-19
	contig_105939		23.6435	3.88714	32.0905	3.23808	0	0	CS pos: 19-20 IHG-LI Pr: 08440	Uncharacterized protein	Oryctes borbonicus	A0A0T6B9P6	3.60e-48
	contig_56757		0	0	0	57.808	0	0		Uncharacterized protein	Schizaphis graminum	A0A2S2NJ23	4.23e-25
	contig_297938		63.9644	52.5596	266.08	237.19	0	0		Uncharacterized protein	Photinus pyralis	A0A1Y1KR68	5.09e-23
	contig_218394		12.2476	16.0963	59.4523	52.8983	0	0		Uncharacterized protein	Clastoptera arizonana	A0A1B6E5S4	8.94e-15

## Sheet: comp. male vs female
	unigene	male antennae FPKM	female antennae FPKM	male palps FPKM	female palps FPKM	wing muscle FPKM	Best BlastP hit	Species	UniProt ID	E-value	Pfam-A domain	Pfam code
	difference between male and female palps
	contig_10820	52.1171	0.208051	68.7119	0	0	Uncharacterized protein	Papilio machaon	A0A0N1IEA2	8.35e-27	no hit
	contig_110472	0.2682	8.27496	0	7.24365	2.11825	Tetraspanin	Apis cerana cerana	A0A2A3EHK8	4.70e-32	Tetraspanin family	PF00335
	contig_125104	2.31706	1.7022	0	3.51313	0	Uncharacterized protein	Bactrocera latifrons	A0A0K8W0F1	0.0	Protein of unknown function (DUF1192)	PF06698
	contig_153352	16.809	0	17.4089	0	0	Larval cuticle protein 5-like Protein	Tribolium castaneum	D6WP14	6.30e-51	Insect cuticle protein	PF00379
	contig_18426	0	0	28.223	0	0	Cuticle protein	Habropoda laboriosa	A0A0L7QWA1	5.22e-25	Insect cuticle protein	PF00379
	contig_223525	15.4363	7.67591	0	13.9201	0	Cathepsin L	Daphnia magna	A0A0P6FZJ9	3.29e-144	Papain family cysteine protease	PF00112
	contig_289849	0.709587	0.875937	0	3.92785	0	Zinc finger protein 512B	Papilio machaon	A0A0N1PG55	6.25e-115	Glycine rich protein family	PF07172
	contig_316646	3.08519	2.48353	0	5.99664	0	Uncharacterized protein	Bactrocera latifrons	A0A0K8VW98	9.08e-26	Protein of unknown function (DUF2816)	PF10992
	contig_344283	0	0	0	69.9086	0	Uncharacterized protein	Daphnia magna	A0A0P5Y7A5	3.67e-47	no hit
	contig_63926	1.66337	4.8051	0	5.88655	0	no hit				Intermediate filament protein	PF00038
	difference between male and female antennae
	contig_104710	0	9.59399	0.203358	0	2782.58	Uncharacterized protein	Photinus pyralis	A0A1Y1K3M7	2.68e-26	Destabilase	PF05497
	contig_153352	16.809	0	17.4089	0	0	Larval cuticle protein 5-like Protein	Tribolium castaneum	D6WP14	6.30e-51	Insect cuticle protein	PF00379
	contig_172153	0	893.234	0	0	353508	no hit				Protein of unknown function, DUF624	PF04854
	contig_188242	0	26.2615	0	0	0	no hit				Argininosuccinate lyase C-terminal	PF14698
	contig_59358	0	169.82	0	0	47454.1	Larval serum protein 2-like Protein	Tribolium castaneum	D6WUR0	7.02e-11	Hemocyanin, all-alpha domain	PF03722
